1       **A bacteriophage-based, highly efficacious, needle and adjuvant-free,**  
2                                                               **mucosal COVID-19 vaccine**

3  
4       **Jingen Zhu<sup>1\*</sup>, Swati Jain<sup>1\*</sup>, Jian Sha<sup>2\*</sup>, Himanshu Batra<sup>1\*\*</sup>, Neeti Ananthaswamy<sup>1\*\*</sup>, Paul**  
5       **B. Kilgore<sup>2</sup>, Emily K. Hendrix<sup>2</sup>, Yashoda M. Hosakote<sup>2</sup>, Xiaorong Wu<sup>1</sup>, Juan P. Olano<sup>3</sup>,**  
6       **Adeyemi Kayode<sup>7</sup>, Cristi L. Galindo<sup>7</sup>, Simran Banga<sup>7</sup>, Aleksandra Drelich<sup>2</sup>, Vivian Tat<sup>2</sup>,**  
7       **Chien-Te K. Tseng<sup>2,4-6</sup>, Ashok K. Chopra<sup>2,4-6\*\*\*</sup>, and Venigalla B. Rao<sup>1\*\*\*</sup>**

8  
9       <sup>1</sup>Bacteriophage Medical Research Center, Department of Biology, The Catholic University  
10      of America, Washington, DC, 20064, USA.

11      <sup>2</sup>Department of Microbiology and Immunology, <sup>3</sup>Department of Pathology, <sup>4</sup>Center for  
12      Biodefense and Emerging Infectious Diseases, <sup>5</sup>Sealy Institute for Vaccine Sciences,  
13      <sup>6</sup>Institute for Human Infections and Immunity, University of Texas Medical Branch,  
14      Galveston, TX, 77555, USA.

15      <sup>7</sup>Department of Biology, Western Kentucky University, Bowling Green, KY, 42101, USA.

16      \* shared first authors

17      \*\* shared second authors

18      \*\*\* Correspondence: [achopra@utmb.edu](mailto:achopra@utmb.edu); [rao@cua.edu](mailto:rao@cua.edu)

19

20 **SUMMARY**

21 The authorized mRNA- and adenovirus-based SARS-CoV-2 vaccines are intramuscularly  
22 injected and effective in preventing COVID-19, but do not induce efficient mucosal  
23 immunity, or prevent viral transmission. We developed a bacteriophage T4-based,  
24 multicomponent, needle and adjuvant-free, mucosal vaccine by engineering spike  
25 trimers on capsid exterior and nucleocapsid protein in the interior. Intranasal  
26 administration of T4-COVID vaccine induced higher virus neutralization antibody titers  
27 against multiple variants, balanced Th1/Th2 antibody and cytokine responses, stronger  
28 CD4<sup>+</sup> and CD8<sup>+</sup> T cell immunity, and higher secretory IgA titers in sera and  
29 bronchoalveolar lavage with no effect on the gut microbiota, compared to vaccination of  
30 mice intramuscularly. The vaccine is stable at ambient temperature, induces apparent  
31 sterilizing immunity, and provides complete protection against original SARS-CoV-2 strain  
32 and its Delta variant with minimal lung histopathology. This mucosal vaccine is an  
33 excellent candidate for boosting immunity of immunized and/or as a second-generation  
34 vaccine for the unimmunized population.

35

36

37

38

39

40

## 41 INTRODUCTION

42 The mRNA, adenovirus-based, and inactivated viral vaccines currently used for human  
43 immunization are having a tremendous impact on tamping down the devastating COVID-  
44 19 pandemic that has caused millions of deaths across the globe. Administered by  
45 intramuscular injections, these vaccines remain as the major source for the rest of the  
46 world's unvaccinated population. Many other vaccines are at various stages of preclinical  
47 studies and clinical trials (Tregoning et al., 2021). However, there are yet no needle-free  
48 mucosal vaccines authorized for human administration (Alu et al., 2022; Chavda et al.,  
49 2021).

50 Although the injectable vaccines are highly effective (70-95%) in preventing severe  
51 symptoms of the disease, hospitalization of patients, and deaths, they do not efficiently  
52 prevent viral acquisition or viral shedding from infected individuals. This is attributed to  
53 the lack of vaccine-induced secretory IgA (sIgA) mucosal immune responses in the  
54 respiratory airways that could prevent person-to-person transmission (Alu et al., 2022;  
55 Corbett et al., 2020; Mercado et al., 2020). Therefore, risk of transmission from  
56 vaccinated subjects, who are susceptible to SARS-CoV-2 infection, as seen currently on a  
57 global scale with the highly transmissible Omicron variants, remains a serious concern  
58 (Tiboni et al., 2021).

59 The current vaccines developed using the spike protein of the ancestral SARS-CoV-2  
60 strain (Wuhan-Hu-1) show progressively diminished efficacy against the subsequently  
61 emerged viral variants of concern (VOCs) such as Alpha, Beta, Gamma, Delta, and most

62 recently Omicron and its subvariant BA.2, which are more efficiently transmitted and/or  
63 more lethal. The evolutionary space for emergence of newer SARS-CoV-2  
64 variants/subvariants that are even more efficiently transmissible and also more lethal  
65 that might render the current vaccines ineffective remains a worrisome and real  
66 possibility (Markov et al., 2022).

67       Considering the evolutionary path of the virus, the most desired next-generation  
68 vaccine(s) would be one that can induce strong mucosal immunity, in addition to broader  
69 systemic immunity (Alu et al., 2022; Chavda et al., 2021; Focosi et al., 2022; Lavelle and  
70 Ward, 2021). Elicitation of target-specific mucosal antibodies at the portal of virus entry  
71 would block virus acquisition as well as shedding of infectious virus particles and their  
72 potential transmission (Afkhami et al., 2022; Bricker et al., 2021; Hassan et al., 2020;  
73 Hassan et al., 2021; Ku et al., 2021; Sterlin et al., 2021b; van Doremalen et al., 2021b).  
74 Such platforms are of particular strategic importance at this stage of the COVID-19  
75 pandemic. Additionally, platforms that are needle- and adjuvant-free and stable at  
76 ambient temperatures would greatly accelerate global distribution efforts, not only for  
77 controlling the current COVID-19 pandemic but also for any future epidemic or pandemic.  
78 Furthermore, needle-free vaccines can be administered easily and safely, and may  
79 provide the best option to vaccinate children.

80       We recently reported (Zhu et al., 2021) the development of a “universal” phage T4  
81 vaccine design platform (Figures 1A) by Clustered Regularly Interspaced Short  
82 Palindromic Repeats (CRISPR) engineering (Liu et al., 2020; Tao et al., 2017) that can

83 rapidly generate multivalent vaccine candidates. Using an intramuscular immunization  
84 scheme, an optimal COVID-19 vaccine candidate (referred to as T4-CoV-2) was selected  
85 that elicited robust immunogenicity, virus neutralizing activity, and complete protection  
86 against ancestral SARS-CoV-2 challenge in a mouse model. This vaccine consisted of T4  
87 phage decorated with ~100 copies of prefusion-stabilized spike ectodomain trimers (S-  
88 trimers) on the surface of 120 x 86 nm virus capsid (Fig. 1A). In addition, the vaccine also  
89 contained SARS-CoV-2 nucleocapsid protein (NP) packaged in the capsid core and a 12-  
90 amino acid (aa) peptide of the putative external domain of E protein (Ee) fused to the  
91 highly antigenic outer capsid protein (Hoc) displayed on the capsid surface (Fig. 1A).

92 The protective immunity of the T4-CoV-2 nanovaccine could potentially be because  
93 of the repetitive and symmetrical arrays of S-trimers on phage particles, resembling the  
94 PAMPs (pathogen-associated molecular patterns) present on human viral pathogens (de  
95 Vries et al., 2021; Freeman et al., 2021; Joyce et al., 2021; Tao et al., 2018b). This  
96 architecture might mimic, in some respects, the spikes displayed on the SARS-CoV-2  
97 virion (Yao et al., 2020). Therefore, we hypothesized that it is probable that such a T4-  
98 CoV-2 nanoparticle when exposed to nasal mucosal surfaces might be recognized as a  
99 natural viral intruder by the resident immune cells, stimulating strong mucosal as well as  
100 systemic immune responses (Figures 1B to 1D). Furthermore, the S-trimer-displayed T4-  
101 CoV-2 nanoparticle could efficiently bind to the nasal epithelium that has the highest  
102 concentration of angiotensin-converting enzyme (ACE2) receptors (Hou et al., 2020).  
103 Additionally, the 155 symmetrically arranged Ig-like Hoc fibers on the T4 capsid are

104 reported to interact with mucin glycoproteins, potentially capturing the T4-CoV-2 vaccine  
105 particles at the nasal mucosa (Barr Jeremy et al., 2015; Barr et al., 2013) (Figure 1D, a),  
106 translocation across the epithelial layer (Nguyen et al., 2017), and uptake by antigen-  
107 presenting cells (Popescu et al., 2021).

108 Here, we tested this hypothesis in a mouse model by intranasal (i.n.) inoculation of  
109 the T4-CoV-2 vaccine and compared the immune responses with those elicited by  
110 intramuscular (i. m.) injection. Remarkably, this needle- and adjuvant-free vaccination  
111 with non-infectious T4-COVID nanoparticles induced strong mucosal, humoral, and  
112 cellular immunity. The responses included spike-specific CD4<sup>+</sup> helper and effector T cells  
113 and CD8<sup>+</sup> killer T cells, and broad neutralization of SARS-CoV-2 VOCs including B.1.135  
114 Beta, B.1.617.2 Delta, and B.1.1.529 Omicron, in both BALB/c as well as human ACE2  
115 (hACE2) transgenic mouse models. Importantly, these responses elicited by needle-free  
116 vaccination are much stronger when compared to the injected vaccine, and strong  
117 mucosal secretory IgA antibodies were measured only in i.n.-vaccinated mice.  
118 Furthermore, the T4-CoV-2 vaccine is stable at ambient temperature, which can be easily  
119 manufactured and distributed at a modest cost. This phage-based mucosal vaccine, thus,  
120 is an excellent candidate for boosting the immunity of immunized and/or as a second-  
121 generation vaccine for the unimmunized populations.

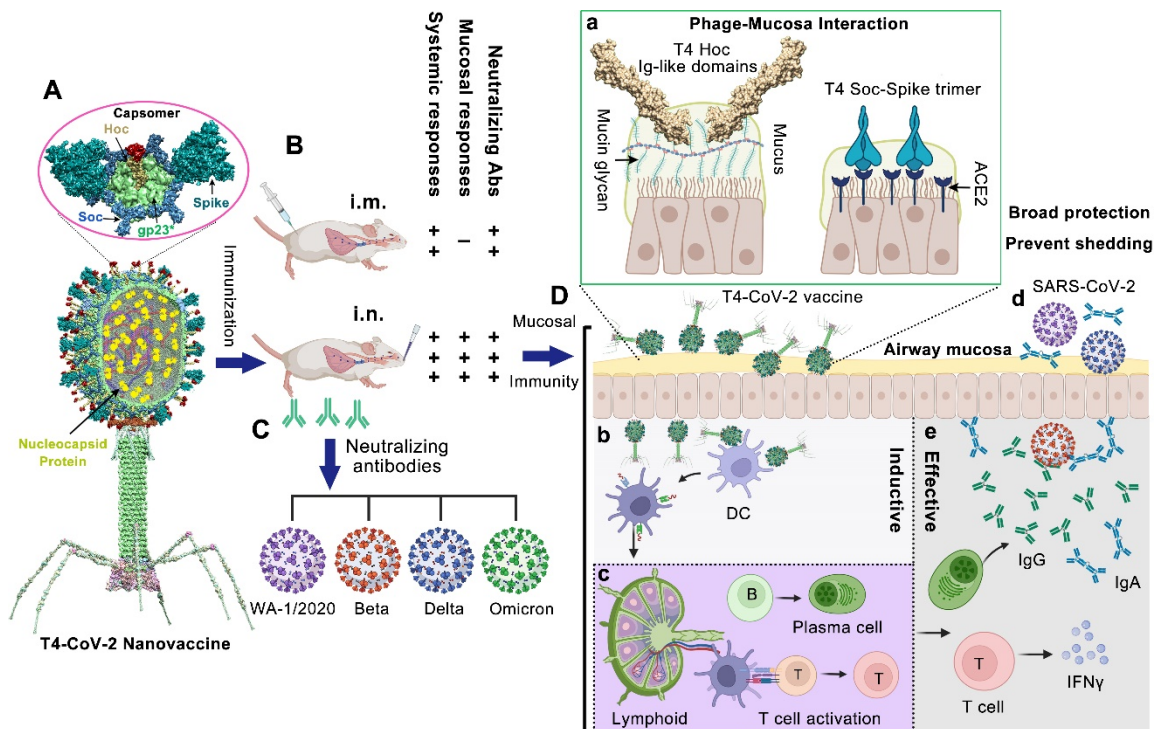

122

123 **Figure 1. Intranasal vaccination of mice using bacteriophage T4-CoV-2 vaccine and**  
 124 **possible mechanisms of protection.**

125 **(A)** Structural model of T4-CoV-2 nanovaccine constructed by CRISPR engineering (Zhu et al., 2021). The enlarged view shows a single hexameric capsomer consisting of six subunits of major capsid protein gp23\* (green), trimers of Soc (blue), and a Hoc fiber (yellow) at the center of capsomer. The NP, Ee, and SpyCatcher gene were “hard-wired” by inserting the respective expressible genes into phage genome, which resulted in display of Ee peptide (red, 155 copies per T4) at the tip of Hoc fiber, SpyCatcher as Soc fusion on capsid surface (~200 copies per capsid), and packaging of NP molecules (yellow, 100 copies per T4) inside the capsid. The Spytagedged Spike trimer (cyan) purified from ExpiCHO cells was then conjugated to Soc-SpyCatcher (Keeble et al., 2019).

134 **(B and C)** Comparison between i.m. and i.n. T4-CoV-2 vaccination (B) and the elicited neutralizing antibodies against SARS-CoV-2 and its VOCs including Beta, Delta, and Omicron (C).

137 **(D)** The mucosal immune responses induced by T4-CoV-2 i.n. vaccination. After i.n. inoculation, T4-CoV-2 particles would bind to mucosal cells: i) through the Ig-like domains of Hoc fibers which interact with mucin glycoproteins, and ii) through the displayed S-trimers which bind to ACE2 that is abundant in nasal epithelium (a). Then, the antigen-presenting cells in the respiratory tract, such as dendritic cells (DCs) capture T4-CoV-2 phage (b), migrate to mucosal-associated lymphoid tissues, and present the antigens to lymphocytes, including B and T cells (c). The activated B cells become plasma cells secreting anti-SARS-CoV-2 IgG and IgA which neutralize virus within the respiratory tract (d and e). The activated T cells migrate to lungs, produce cytokines and regulate the immune responses, and/or directly attack virus-infected host cells. These mucosal

147 immune responses produced by T4-CoV-2 i.n. vaccination might be able to block viral  
148 entry (host's viral acquisition) and viral exit (host's viral shedding) in the respiratory tract.

149

## 150 **RESULTS**

151 **Needle-free T4-CoV-2 nanovaccine stimulates more robust humoral and cellular**  
152 **immune responses against SARS-CoV-2 and VOCs than an injectable vaccine**

153 The immunogenicity of the T4-CoV-2 nanovaccine was first evaluated in 5-week-old  
154 conventional BALB/c mice. In a standard prime-boost regimen (Figures 2A and 2B),  
155 animals received two i.m. or i.n. doses of either the T4 phage (vector control) or the T4-  
156 CoV-2 phage vaccine decorated with 20  $\mu\text{g}$  (high-dose;  $\sim 2.5 \times 10^{11}$  particles), 4.8  $\mu\text{g}$   
157 (medium-dose,  $\sim 6 \times 10^{10}$  particles), or 0.8  $\mu\text{g}$  (low-dose;  $\sim 1 \times 10^{10}$  particles) of SARS-CoV-  
158 2 Spike-ectodomain (Secto, aa 1 - 1213) trimers. In a 1-dose regimen, animals received a  
159 single i.m. high-dose of the T4-CoV-2 vaccine.

160 *Antibody responses (IgG, isotypes, and IgA):* To evaluate humoral antibody  
161 responses, sera were collected on day 21 after the last dose (Figure 2B), and IgG, IgG1,  
162 and IgG2a antibodies specific to Secto protein or the receptor-binding domain (RBD) were  
163 quantified by ELISA (Figures 2C to 2H, Figure S1). The phosphate-buffered saline (PBS)  
164 and T4-vector control groups, as expected, induced no significant antigen-specific  
165 antibodies, whereas the T4-CoV-2 vaccinated groups (either i.m. or i.n.) triggered high  
166 levels of IgG antibodies (Figures 2C and 2F).

167 High levels of both Th1 (IgG2a) and Th2 (IgG1) subtype antibodies were induced by  
168 i.m. and i.n. immunizations, demonstrating that the T4-CoV-2 vaccine triggered balanced



169 Th1- and Th2-derived antibody responses (Figures 2D, 2E, 2G, and 2H). This is in contrast  
170 to the alum-adjuvanted subunit vaccines that show strong Th2-bias (Zhu et al., 2021). The  
171 balanced immune response was also uniformly recapitulated in a dose response  
172 experiment. Nearly the same levels of Th1 and Th2 antibody responses were elicited with  
173 the medium-dose as with the high-dose, while the levels were lower (5-25-fold) with the  
174 low-dose or single-dose antigen (Figure S1).

175 Intriguingly, the T4-CoV-2 vaccine induced high levels of spike-specific serum IgA  
176 antibodies when administered by either the i.m. or the i.n. route (Figures 2I and 2J). This  
177 is notable because IgA stimulation is not commonly observed in traditional vaccines  
178 including the current COVID-19 vaccines. For example, the adenovirus-based vaccines do  
179 not elicit significant spike-specific serum IgA titers when injected by the i.m. route  
180 (Hassan et al., 2020). Elicitation of serum IgA is considered desirable for an effective  
181 COVID-19 vaccine because IgA antibodies are reported to have anti-inflammatory activity  
182 and are more potent than IgG in neutralizing SARS-CoV-2 virus during the early phase of  
183 infection (Sterlin et al., 2021b).

184 *Virus neutralizing antibodies:* To further analyze humoral immunity, the virus  
185 neutralizing activity of the elicited antibodies was determined by Vero E6 cell cytopathic  
186 assay using SARS-CoV-2 WA-1/2020 ancestral strain in the US (Harcourt et al., 2020). As  
187 shown in Figure S2A, the T4-CoV-2 vaccine induced strong neutralizing activity in sera of  
188 all immunized mice. Significantly higher neutralizing antibody titers were detected in  
189 mice immunized i.m. with 2 doses of the T4-CoV-2 vaccine than with a single dose

190 immunization (Figure S2A). Importantly, a higher neutralizing antibody titer (3-fold) was  
191 induced by i.n. vaccination when compared to i.m. route of high-dose immunization  
192 (Figure S2A).

193 It is well known that Beta and Delta variants escape vaccine-induced immune  
194 responses (Mistry et al., 2022). Intriguingly, the T4-CoV-2 vaccine elicited comparable  
195 virus neutralizing activities to WA-1/2020, Beta (B.1.351), and Delta (B.1.617.2) VOCs  
196 (Figure 1K). Additionally, ~3-fold higher neutralizing antibody titer against SARS-CoV-2  
197 and its VOCs was elicited by i.n. vaccination of mice when compared to i.m. route of  
198 immunization, while no detectable neutralizing activity was detected in T4 vector or PBS  
199 control groups (Figure 1K).

200 *Cell-mediated immunity:* To evaluate cellular immune responses, splenocytes were  
201 harvested from mice on day 26 after the boost (Figure 1B). Antigen-specific CD8<sup>+</sup> and  
202 CD4<sup>+</sup> T cells were identified after *ex vivo* restimulation with either S-trimer (Figures 2L  
203 and 2M; Figures S2B and S2C) or with SARS-CoV-2 peptides spanning the S- and NP-  
204 proteins (Figures S2D and S2E). The samples were then analyzed by intracellular staining  
205 of accumulated cytokines and flow cytometry. The percentages of CD8<sup>+</sup> and CD4<sup>+</sup> T cells  
206 positive for interferon (IFN)- $\gamma$ , tumor necrosis factor (TNF)- $\alpha$ , or interleukin 17A (IL-17A)  
207 were elevated in T4-CoV-2 immunized mice as compared to the T4 vector control group  
208 irrespective of the immunization routes and the virus-specific stimulants used (Figures 2L  
209 and 2M; Figures S2B to S2E).

210 IFN $\gamma$  is a predominant cytokine secreted by effector CD8<sup>+</sup> T cells, Th1 CD4<sup>+</sup> T cells,  
211 and NK cells (Castro et al., 2018). More specifically, with re-stimulation of splenocytes  
212 using S protein, significant levels of IFN $\gamma$ <sup>+</sup> CD8<sup>+</sup> cells, which play a critical role in SARS-  
213 CoV-2 viral clearance, were observed in i.n.-immunized mice (Figure 2L). Additionally,  
214 significantly elevated percentages of CD4<sup>+</sup> T cells producing IFN $\gamma$  were detected in the i.n.  
215 group in comparison to the i.m. group of vaccinated mice (Figure 2M, Figure S2C). These  
216 data indicated an enhanced Th1-mediated immunity induced by i.n. administration of the  
217 vaccine. Of note, we did not observe significant differences between i.n. and i.m. routes  
218 of immunization regarding either the IFN $\gamma$ <sup>+</sup> CD8<sup>+</sup> cells or the IFN $\gamma$ <sup>+</sup> CD4<sup>+</sup> cells when  
219 restimulated with S- and NP-peptides (Figures S2D and S2E). Probably the conformational  
220 epitopes in S- and NP- proteins could contribute to these differences of higher IFN $\gamma$  levels  
221 in the i.n. group of animals. The robust T cell cytokine responses paralleled greater T cell  
222 proliferation in both i.n. and i.m. immunized groups of animals as compared to the T4  
223 vector control group (Figures S2F and S2G).

224 Additionally, representative Th1 and Th2 cytokines in cell supernatants of the  
225 splenocytes were analyzed by Bio-Plex platform. Both routes of immunization triggered  
226 increased production of Th1 cytokines (IFN $\gamma$ , IL-2, TNF $\alpha$ , and IL12-p70) (Figures 2N to 2Q;  
227 Figures S2H to S2K) and Th2 cytokines (IL-4, IL-5, IL-10, and IL-13) (Figures 2R to 2U;  
228 Figures S2L to S2N) compared to controls when splenocytes were stimulated with S-  
229 trimer (Figures 2N to 2U) or S- and NP-peptides (Figures S2H to S2N). Increases in Th1  
230 and Th2 cytokine levels by T4-CoV-2 immunization were consistent with induction of

231 balanced Th1 and Th2 antibodies and cellular immune responses, as described above.  
232 Importantly, the levels of the main Th1 cytokines, including IFN $\gamma$ , IL-2, and TNF $\alpha$ , were  
233 significantly higher in animals immunized by the i.n. route than those in mice immunized  
234 by the i.m. route (Figures 2N to 2P; Figures S2H to S2J). These data indicated that T4-CoV-  
235 2 i.n. immunization most likely produced more Th1-biased immune responses. The  
236 vaccine-associated enhanced respiratory disease has not usually occurred when strong  
237 Th1 cell responses are induced. Therefore, considering that COVID-19 vaccine designs  
238 developed to date have attempted to elicit either a Th1-biased or a Th1/Th2-balanced  
239 cell response (Sadarangani et al., 2021; Sette and Crotty, 2021), the T4-CoV-2 vaccine  
240 generated the desirable responses.  
241

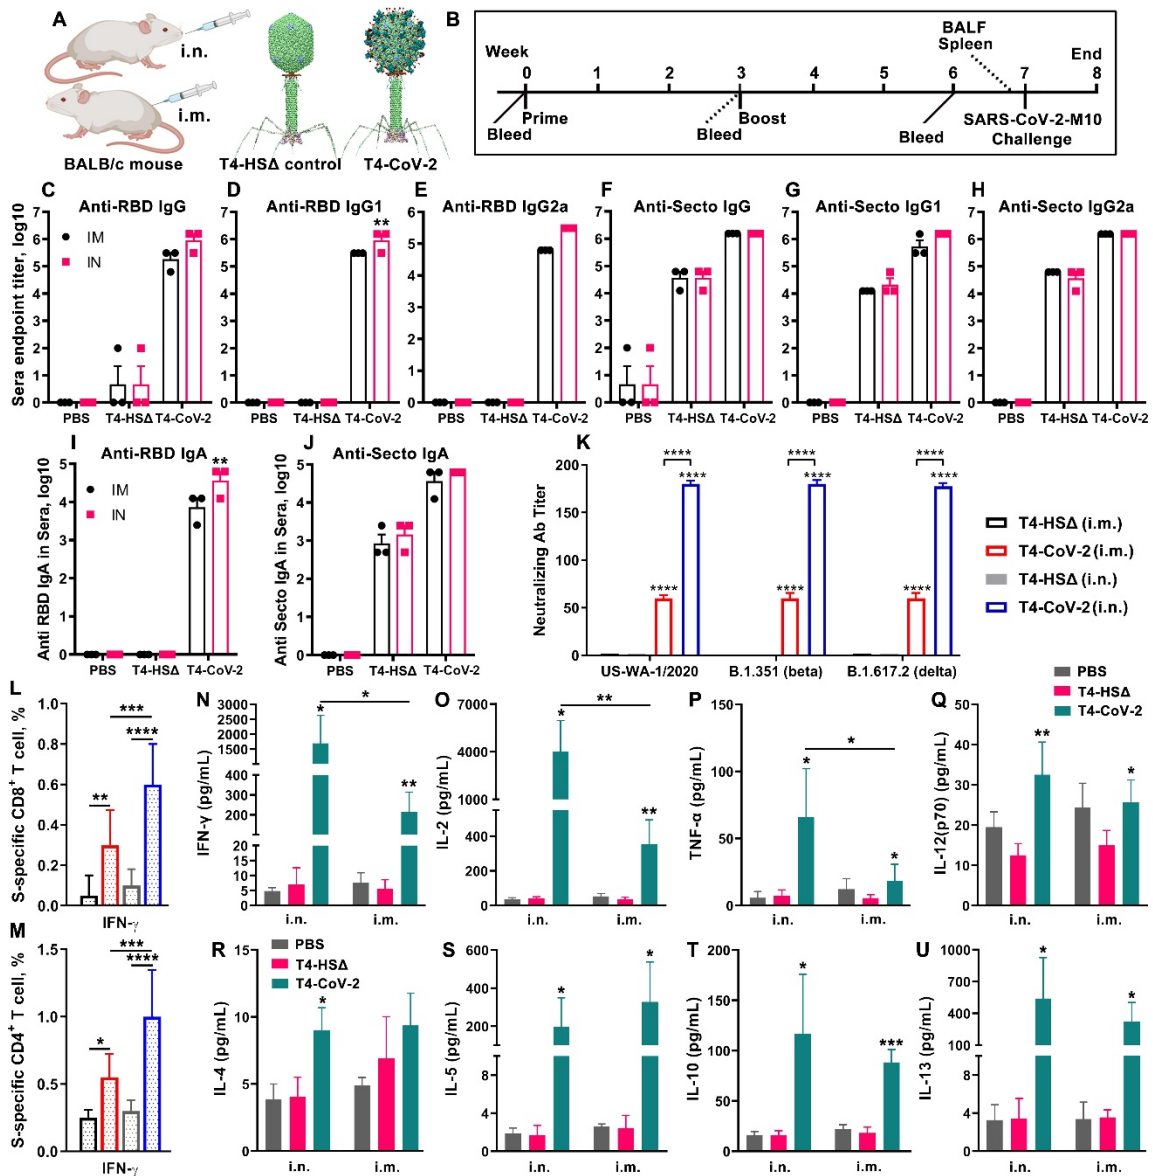

242

243 **Figure 2. Intranasal immunization elicited greater anti-spike/RBD systemic humoral and**  
 244 **cellular responses over intramuscular immunization.**

245 **(A)** Schematic of T4-CoV-2 i.n. and i.m. vaccinations with T4-HocΔ-SocΔ (T4-HSΔ) phage  
 246 (left, vector control) and T4-CoV-2 recombinant phage (right, vaccine phage).

247 **(B)** Scheme for vaccination and challenge.

248 **(C to J)** Antibody responses in sera of immunized mice at day 21 after the last dose.  
 249 Enzyme-linked immunosorbent assay (ELISA) was used to measure reciprocal endpoint  
 250 antibody titers of anti-RBD IgG (C), anti-RBD IgG1 (D), anti-RBD IgG2a (E), anti-Secto IgG  
 251 (F), anti-Secto IgG1 (G), anti-Secto IgG2a (H), anti-RBD IgA (I), and anti-Secto IgA (J). Data  
 252 represent mean ± SEM. Data are from 3 pooled independent experiments (n = 22 for T4-  
 253 CoV-2, n = 10 for T4-HSΔ, and n = 5 for PBS).

254 **(K)** Virus neutralizing activity in sera of i.m. and i.n. immunized mice was determined by  
 255 Vero E6 cell cytopathic assay using ancestral SARS-CoV-2 US-WA-1/2020, B.1.351 (Beta),

256 and B.1.617.2 (Delta) strains.

257 **(L and M)** Cellular immune responses. Percentages of IFN $\gamma$ <sup>+</sup> CD8<sup>+</sup> (L) and IFN $\gamma$ <sup>+</sup> CD4<sup>+</sup> (M)  
258 cells were plotted.

259 **(N to U)** Cytokine responses. Representative Th1 (N to Q) and Th2 (R to U) cytokines are  
260 shown.

261 For K to M, two-way ANOVA with Tukey post hoc test to compare multiple groups. For N  
262 to U, nonparametric Student's t test to compare T4-vector control vs T4-CoV-2 vaccine  
263 groups and i.n. vs i.m. routes of vaccination. \*P < 0.05; \*\*P < 0.01, \*\*\*P < 0.001,  
264 \*\*\*\*P < 0.0001. Data represent mean  $\pm$  standard deviation and are representative of five  
265 biological replicates.

266

### 267 **Needle-free T4-CoV-2 vaccination elicits robust mucosal immune responses**

268 It is generally recognized that i.n. vaccination leads to higher levels of sIgA antibodies at

269 the mucosal surface with lower systemic IgG antibodies and cellular immune responses,

270 while the opposite is true for i.m. vaccination (Krammer, 2020; Macpherson et al., 2008;

271 Su et al., 2016; Tiboni et al., 2021). Remarkably, however, i.n. T4-CoV-2 vaccination

272 induced higher systemic as well as mucosal immune responses (Figures 2 and 3). This

273 appears to be a distinctive feature of the T4 nanoparticle vaccine.

274 Indeed, the needle-free T4-CoV-2 vaccine induced robust mucosal IgG and sIgA

275 responses. These anti-RBD or anti-Spike antibody titers were determined in

276 bronchoalveolar lavage fluid (BALF) samples of vaccinated mice after the booster dose

277 (Figure 3). Intranasally administered vaccine elicited ~25-fold higher IgG antibody levels

278 in BALF compared to when animals were vaccinated by the i.m. route (Figures 3A and 3E),

279 which also included both the Th1-biased IgG2a and Th2-biased IgG1 subtype antibodies

280 in a balanced manner (Figures 3B, 3C, 3F, and 3G).

281 The sIgA antibodies play a critical role in protecting mucosal surfaces against

282 pathogens by blocking their attachment and/or entry of viruses transmitted through the

283 respiratory tract. Thus, most significantly, high titers of mucosal sIgA antibodies were  
284 elicited by i.n. vaccination (Figures 3D and 3H), in addition to high levels of systemic  
285 immune responses as described above (Figure 2). In contrast, i.m. immunization failed to  
286 produce sIgA, which is not unexpected (Figures 3D and 3H). Since IgA antibodies are  
287 dimeric, they might have stronger SARS-CoV-2 viral neutralization activity, and therefore,  
288 could confer protection at the site of exposure because mucosal surfaces of the  
289 respiratory tract, including the nasal regions and lung epithelial cells, are the major  
290 targets for SARS-CoV-2 infection (Figure 1Ee) (Asahi-Ozaki et al., 2004; Lapuente et al.,  
291 2021; Renegar et al., 2004).

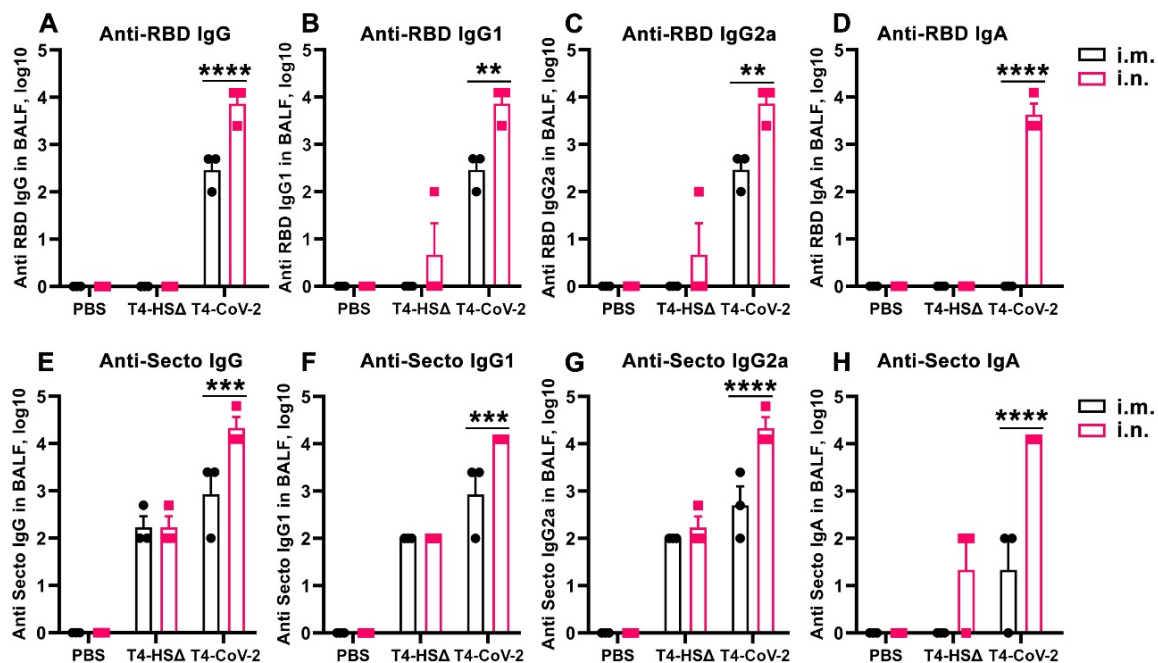

292  
293 **Figure 3. Intranasal immunization with T4-CoV-2 vaccine induced robust mucosal**  
294 **immune responses.** The reciprocal endpoint antibody titers in BALF of anti-RBD IgG (A),  
295 anti-RBD IgG1 (B), anti-RBD IgG2a (C), anti-RBD IgA (D), anti-Secto IgG (E), anti-Secto IgG1  
296 (F), anti-Secto IgG2a (G), and anti-Secto IgA (H) are shown. Data represent mean  $\pm$  SEM.  
297 Data are from 3 pooled independent experiments (n = 12 for T4-CoV-2, n = 10 for T4-HSA,  
298 and n = 5 for PBS). The titers between i.m. and i.n. route were compared and statistically  
299 analyzed by two-way ANOVA test; \*\*P<0.01, \*\*\*P<0.001, \*\*\*\*P<0.0001.

300

301 **Needle-free T4-CoV-2 vaccine provides complete protection and apparent sterilizing**  
302 **immunity against SARS-CoV-2 challenge**

303 *Animal challenge:* BALB/c mice were challenged with the mouse-adapted SARS-CoV-2  
304 strain (MA10) (Leist et al., 2020) (Figure 2B). As shown in Figures 4A to 4D, the control  
305 animals that received the T4 vector exhibited a rapid weight loss soon after infection,  
306 with a maximum decrease on days 2-4 (Figures 4A and 4B). On the other hand, mice  
307 immunized with the T4-CoV-2 vaccine by either of the two immunization routes showed  
308 modest-to-no weight loss over the course of 7 days after challenge. However, the data  
309 were more impressive after i.n. immunization.

310 More specifically, the weight loss curves among the high, the medium, and the low  
311 dose groups of i.n. vaccination were almost similar statistically. Compared to the T4  
312 vector control, a much-reduced loss in body weights were noted on day 2 post infection  
313 (p.i.) in all of the T4-CoV-2 vaccinated groups of mice with subsequent minimal and  
314 statistically insignificant fluctuations in body weight changes until day 7 (Figure 4A).

315 In i.m.-immunized groups, a similar comparison showed statistically significant  
316 differences on different days (Figure 4B). Significantly less efficacy of the vaccine was  
317 apparent when the number of phage particles was reduced from  $2.5 \times 10^{11}$  to  $1 \times 10^{10}$   
318 between days 3-5 p.i. (Figure 4C). Similarly, significantly more weight loss was noticed in  
319 mice i.m. immunized with one dose of the T4-CoV-2 vaccine as compared to those  
320 receiving two doses on days 2-4 p.i. (Figure 4D). These data were consistent with the



321 lower levels of immune responses elicited by i.m. vaccination when compared to i.n.  
322 vaccination.

323 *Viral load:* To further assess protective efficacy in the lungs, the infectious virus load  
324 was determined by plaque assay on days 2 and 5 p.i., the peak period of viral burden in  
325 this model. As shown in Figure 4E, no infectious SARS-CoV-2 virus could be detected in  
326 the lungs of mice immunized with the T4-CoV-2 vaccine ( $2.5 \times 10^{11}$  phage particles) by  
327 either the i.m. or the i.n. route. Quite the opposite, very high levels of virus,  $\sim 10^5$  to  $10^7$   
328 TCID<sub>50</sub>/g (Tissue culture infectious disease [TCID]), were present on day 2 of the control  
329 mice, which decreased substantially on day 5 p.i., at which time the survived animals  
330 began to recover from infection. This indicates that the vaccine might be inducing  
331 sterilizing immunity, hence minimizing live virus shedding. This is consistent with the  
332 induction of strong mucosal immunity as evident from S-specific IgG and sIgA responses  
333 in the lungs of i.n.-vaccinated mice. However, even the i.m.-vaccinated mice showed  
334 sterilizing immunity suggesting that the relatively low levels of mucosal immunity due to  
335 S-specific IgG in lungs combined with the strong CD8<sup>+</sup> cytotoxic T cells might be sufficient  
336 to clear the virus-infected cells.

337 *Histopathology:* The lung tissues obtained from the control and immunized mice  
338 were subjected to H&E (hematoxylin and eosin) and MOVAT staining for histopathological  
339 analysis. The analysis was performed based on three parameters: mononuclear  
340 inflammatory infiltrate around bronchovascular bundles, interstitial inflammation, and  
341 alveolar exudate/hemorrhage.

342 As shown in Figure 4F, the uninfected normal lungs had delicate alveolar septa (black  
343 arrow) and distinct alveolar spaces (blue arrow) with no evidence of inflammation,  
344 hemorrhage, exudates, or transudates (panel a, 200x). On the other hand, prominent  
345 inflammatory infiltrates of bronchovascular bundles (red arrow) as well as interstitial  
346 involvement (black arrow) were noticed in the T4-vector control mice (i.n. immunized)  
347 during virus infection (panel b, 40x). More specifically, mononuclear inflammatory  
348 infiltrates were noticed around pulmonary vessel (black arrow, panel c, 200x) and  
349 bronchovascular bundle (black arrow, panel d, 100x). Distal airways with interstitial  
350 inflammation in alveolar septa (black arrow, panel e) were evident. In addition, alveolar  
351 hemorrhage was also observed in other areas of the lungs.

352 As for the T4-CoV-2 i.n. immunized mice, only mild and patchy inflammatory  
353 infiltrate of bronchovascular bundles (black arrow, panels f & g, 40x and 100x,  
354 respectively) were noted after infection and the alveolar spaces and interstitium  
355 appeared normal (panels f and g). Such minimal infiltrates in the lungs were also  
356 observed in SARS-CoV-2 mRNA and adenovirus vaccines (Corbett et al., 2020; Hassan et  
357 al., 2020). Overall, the combined scores based on the above three parameters were  
358  $6.2 \pm 1.3$  for the T4 vector control and  $4.4 \pm 1.1$  for the T4-CoV-2 vaccine i.n. immunized  
359 animals ( $p = 0.01$ ) when combined data on tissues after 2 and 5 days of challenge were  
360 analyzed.

361 Collectively, T4-CoV-2 vaccination by either route completely protected mice  
362 against SARS-CoV-2 challenge with no significant infectious virus detectable and marked

363 attenuation of the inflammatory response in the lungs. These data indicated that the T4-  
 364 CoV-2 vaccine was effective in clearing the virus and potentially could block transmission  
 365 of SARS-CoV-2.

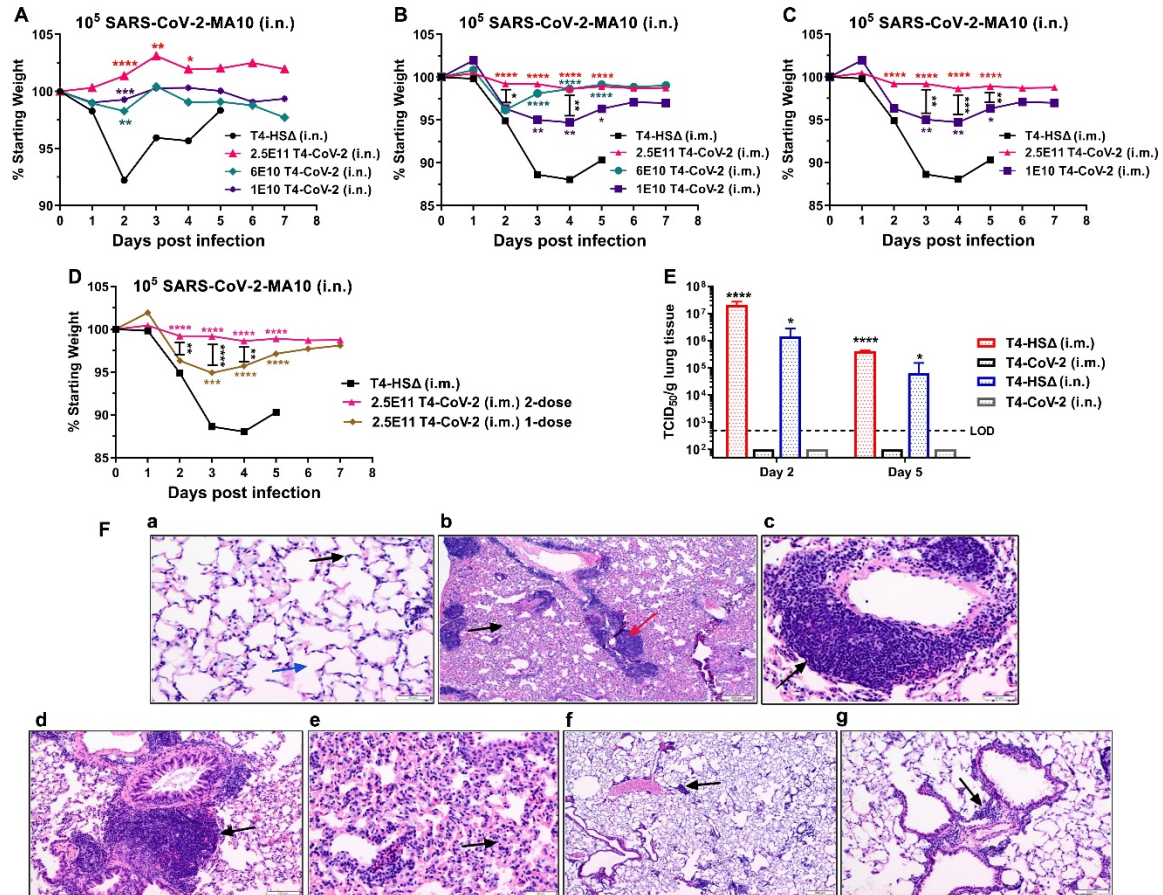

366 **Figure 4. Needle-free T4-CoV-2 vaccination provided complete protection against SARS-**  
 367 **CoV-2 challenge.**

369 **(A to D)** Percentage starting body weight of i.n. (A) and i.m. (B to D) immunized mice at  
 370 days after intranasal challenge with SARS-CoV-2 MA10.

371 **(E)** Viral burden (TCID<sub>50</sub>/g lung tissue) in the lungs at 2 days and 5 days post-SARS-CoV-2  
 372 MA10 infection. T4-CoV-2 immunization was compared with vector control in either i.m.  
 373 or i.n. groups. Dotted lines indicate the limit of detection (LOD) of the assay.

374 **(F)** Histopathological analysis of lung tissues from the vector control and T4-CoV-2 i.n.  
 375 immunized and challenged mice. Representative photomicrographs from each group are  
 376 shown. **a.** Medium power view of normal lung with delicate alveolar septa (black arrow)  
 377 and distinct alveolar spaces (blue arrow) (200X). **b.** Low power view of lungs of the  
 378 challenged control mice with prominent inflammatory infiltrates of bronchovascular  
 379 bundles (red arrow), as well as interstitial involvement (black arrow; 40X). **c.** Medium  
 380 power view of mononuclear inflammatory infiltrates around pulmonary vessel (black

381 arrow; 200X) in the challenged control mice. **d.** Medium power view of mononuclear cell  
382 infiltrate around bronchovascular bundle (black arrow; 100X) in the challenged control  
383 mice. **e.** Medium power view of distal airways with evidence of interstitial inflammation  
384 in alveolar septa (black arrow) in the challenged control mice. **f.** Low power view of lung  
385 with mild and patchy inflammatory infiltrate of bronchovascular bundles (black arrow) in  
386 the challenged T4-CoV-2 immunized mice. Alveolar spaces and interstitium appear  
387 normal (40X). **g.** Medium power view of inflammatory infiltrate around bronchovascular  
388 bundle (black arrow; 100X) in the challenged T4-CoV-2 vaccinated mice.

389 A-D, two-way ANOVA with Tukey's post hoc test to compare multiple groups; E, one-way  
390 ANOVA with Tukey's post hoc test (i.m.) and Mann-Whitney U test (i.n.) (n = 2-5).  
391 \*P < 0.05; \*\*P < 0.01, \*\*\*P < 0.001, \*\*\*\*P < 0.0001.

392

### 393 **A Beta-variant needle-free T4-CoV-2 vaccine stimulates strong mucosal, humoral, and** 394 **cellular immune responses in human ACE2 (hACE2) transgenic mice**

395 To determine if the robust and diverse immune responses elicited by the T4-CoV-2  
396 vaccine, especially the mucosal responses, could be recapitulated in highly susceptible  
397 hACE2 knock-in mice, we conducted an independent study. Additionally, we constructed  
398 a beta-variant spike trimer (Secto- $\beta$ ) (without any affinity tags) for vaccination as this was  
399 a dominant strain at the time of the study causing a major second wave in South Africa  
400 and across the globe (Tegally et al., 2021). Secto- $\beta$  contained four critical mutations  
401 (K417N, E484K, N501Y, and D614G) that conferred enhanced transmissibility and lethality,  
402 and also partial escape from vaccine-induced immunity (Ahmad, 2021) (Figure S3A). The  
403 Secto- $\beta$  variant trimer conjugated to T4 capsid as efficiently as the WT S-trimer through  
404 the Spytag-SpyCatcher system (Zhu et al., 2021) (Figure S3B). In addition, the T4-CoV-2- $\beta$   
405 vaccine also contained ~100 copies of NP protein packaged inside the capsid (Figure S3C).  
406 Five-week-old hACE2 AC70 mice were immunized with this vaccine using the same prime-

407 boost regimen (Figure 5A and 5B) at a high dose ( $\sim 2.5 \times 10^{11}$  phage particles decorated  
408 with 20  $\mu\text{g}$  of variant Secto- $\beta$ ).

409 *Humoral immune responses:* Similar to the binding antibody titers in BALB/c mice  
410 (Figures 2 and 3), i.n. immunization with T4-CoV-2- $\beta$  induced high levels of Spike- and  
411 RBD-specific IgG and IgA in sera of hACE2-transgenic mice (Figures 5C to 5J), suggesting  
412 a strong systemic humoral immune response. In addition, moderate NP-specific IgG  
413 antibodies were also elicited in the T4-CoV-2- $\beta$  immunized mice (Figure S3D).  
414 Furthermore, high levels of Spike- and RBD-specific IgG and sIgA antibodies were also  
415 present in BALF of T4-CoV-2- $\beta$  vaccinated mice indicating an equally robust mucosal  
416 immune response (Figures 5C to 5J, Figures S4A to S4D). Finally, balanced Th1 and Th2  
417 antibody responses were induced both in sera and BALF, in T4-CoV-2- $\beta$  immunized mice  
418 (Figures 5D, 5E, 5G, and 5H; Figures S4B and S4C). There was no significant difference in  
419 binding antibody titers between Secto and Secto- $\beta$  as the coating antigen (Figures S4E  
420 and S4F), probably because they share a large number of the same epitopes. Collectively,  
421 consistent with our findings in BALB/c mice, T4-CoV-2- $\beta$  i.n. vaccination stimulated strong  
422 mucosal and systemic humoral immune responses in hACE2-transgenic mice.

423 Importantly, consistent with the broad-spectrum neutralizing activities in BALB/c  
424 mice (Figure 1K), T4-CoV-2- $\beta$  vaccine elicited comparable virus neutralizing activities to  
425 WA-1/2020 and its Delta (B.1.617.2) VOC in hACE2-transgenic mice, while no detectable  
426 neutralizing activities were detected in PBS or T4 vector control groups (Figure 5K).  
427 Additionally, the Omicron (BA.1) variant emerged in late November of 2021 (near the end

428 of this study) and has the largest number (>30) of mutations within the spike protein  
429 described to date. These mutations substantially jeopardized the efficacy of existing  
430 COVID-19 vaccines (Edara et al., 2022; Ying et al., 2022), resulting in a major spike in  
431 breakthrough infections. Our T4-CoV-2- $\beta$  vaccinated sera neutralized the Omicron variant  
432 (B.1.1.529) but the titers were 6-fold lower when compared to the WA-1/2020 strain  
433 (Figure 5K). Interestingly, neutralization of Omicron was comparable to that of WA-  
434 1/2020 in BALF (Figure S5A), although the BALF titer appeared lower than that of sera,  
435 largely due to dilution of the lung lining fluid.

436 *Cell-mediated immune responses:* As shown in Figures 5L and 5M, restimulation of  
437 splenocytes *ex vivo* with S protein showed a similar pattern of CD8<sup>+</sup> and CD4<sup>+</sup> T cell  
438 activation in hACE2 mice as with the conventional BALB/c mice (Figures 2L and 2M). The  
439 percentages of CD8<sup>+</sup> and CD4<sup>+</sup> T cells positive for IFN $\gamma$  were substantially elevated in T4-  
440 CoV-2- $\beta$  immunized mice as compared to both PBS and T4 vector control groups (Figures  
441 5L and 5M). Interestingly, a much higher percentage of IFN $\gamma$  positive CD4<sup>+</sup> T cells was  
442 observed in hACE2 mice than those in conventional BALB/c mice, while the percentage  
443 of TNF $\alpha$  or IL-17A positive T cells were similar (Figures S5B and S5C). T4-CoV-2- $\beta$  i.n.  
444 immunization developed robust spike-specific CD8 and CD4 T cell responses in hACE2-  
445 transgenic mice.

446 Similarly, both Th1 cytokines (IFN $\gamma$ , IL-2, TNF $\alpha$ , and IL12-p70) (Figures 5N to 5Q) and  
447 Th2 cytokines (IL-4, IL-5, and IL-13) (Figures 5R to 5T) were induced in T4-CoV-2- $\beta$ -  
448 immunized mice compared to the controls when splenocytes were re-treated with the

449 Secto- $\beta$  trimer. Significantly, very prominent Th1 cytokines IFN $\gamma$  and IL-2 were produced,  
 450 indicating Th1-biased cellular immune responses induced by intranasal T4-CoV-2- $\beta$   
 451 vaccine.

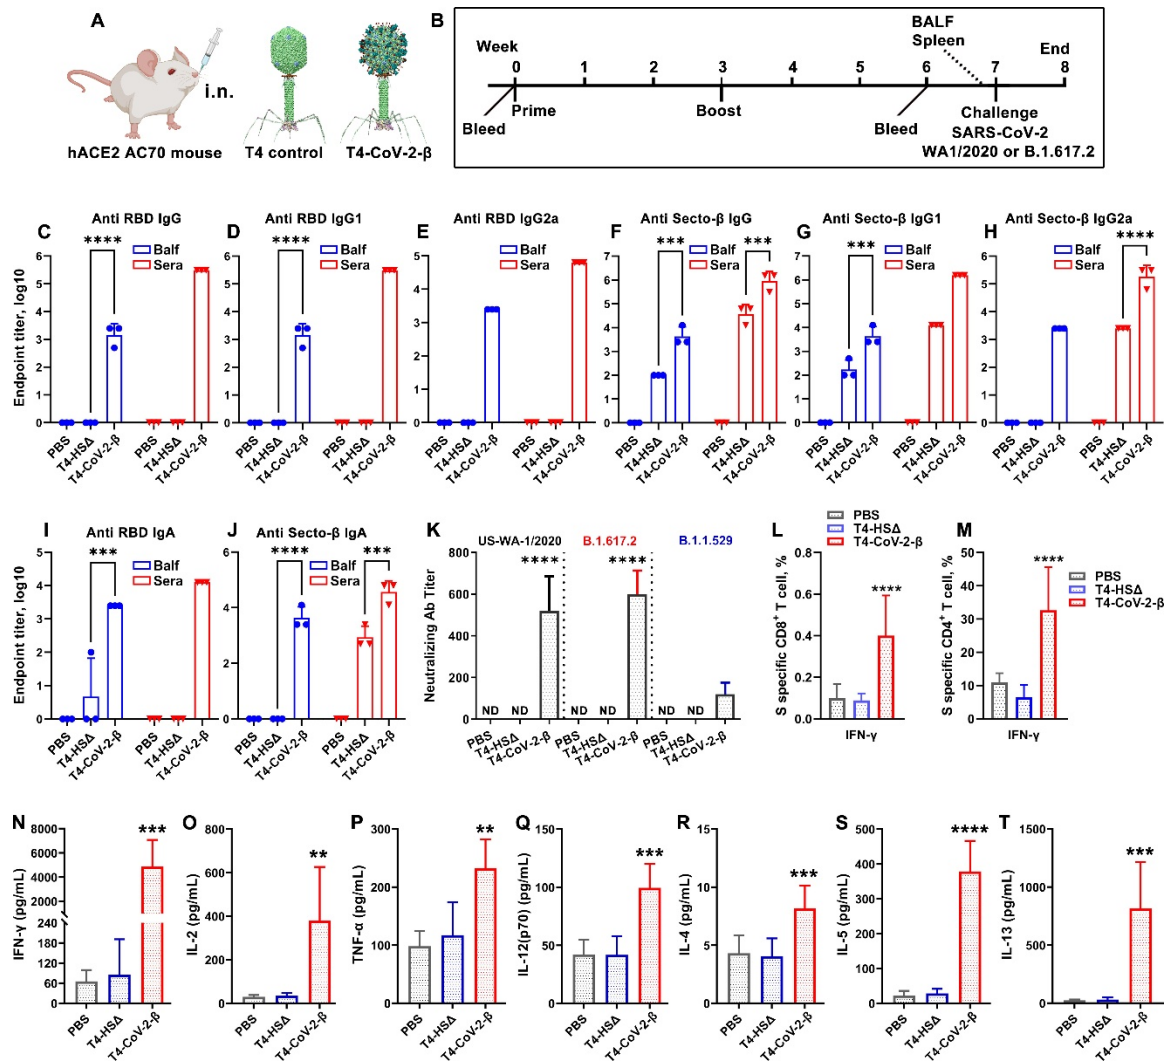

452 **Figure 5. Intranasal T4-CoV-2- $\beta$  vaccination stimulated robust mucosal and systemic**  
 453 **humoral and cellular immune responses in human ACE2 (hACE2) transgenic mice.**  
 454 **(A)** Schematic of intranasal mouse vaccination with T4-HS $\Delta$  control or T4-CoV-2- $\beta$  vaccine.  
 455 **(B)** Scheme for vaccination and challenge.  
 456 **(C to J)** Antibody responses in sera (red) and BALF (blue) of immunized mice on day 21  
 457 after the boost. ELISA assay was applied to determine reciprocal endpoint antibody titers  
 458 of anti-RBD IgG (C), anti-RBD IgG1 (D), anti-RBD IgG2a (E), anti-Secto- $\beta$  IgG (F), anti-Secto-  
 459  $\beta$  IgG1 (G), anti-Secto- $\beta$  IgG2a (H), anti-RBD IgA (I), and anti-Secto- $\beta$  IgA (J).  
 460 **(K)** Neutralizing antibody titers in sera were determined by Vero E6 cell cytopathic assay  
 461 using WA-1/2020, B.1.617.2 (Delta), and B.1.1.529 (Omicron) strains.  
 462

463 **(L and M)** Cellular immune responses after stimulation with Secto- $\beta$  protein. Percentage  
464 of IFN $\gamma$ <sup>+</sup> CD8<sup>+</sup> (L) and IFN $\gamma$ <sup>+</sup> CD4<sup>+</sup> (M) cells were plotted.

465 **(N to T)** Splenocyte cytokine responses to Secto- $\beta$  protein stimulation in immunized  
466 hACE-2 transgenic mice. Representative Th1 (N to Q) and Th2 (R to T) cytokines are shown.  
467 C to M, two-way (C to J, L to M) or one-way ANOVA (K) with Tukey post hoc test; N to T,  
468 nonparametric Student's t test. Data are from 3 pooled independent experiments (n = 15  
469 for T4-HSA and PBS sera analysis, n = 21 for T4-CoV-2- $\beta$  sera analysis, and n = 5 for BALF  
470 analysis). Data are representative of two (K) or five biological replicates (L to T). \*\*P < 0.01,  
471 \*\*\*P < 0.001, \*\*\*\*P < 0.0001.

472

473 **Needle-free T4-CoV-2-Beta vaccine provides complete protection and apparent**  
474 **sterilizing immunity against lethal infection by both the original SARS-CoV-2 and the**

475 **Delta VOC in hACE2 transgenic mice**

476 *Animal challenge and viral load:* Mice were i.n. challenged with either WA-1/2020 strain  
477 or its Delta (B.1.617.2) variant. The highly contagious B1.617.2 shows increased  
478 transmissibility compared to the ancestral strain, and studies suggested a high risk of  
479 hospitalization compared to the original strain (Liu and Rocklöv, 2021). As shown in Figure  
480 6A, irrespective of the challenge strains, all control animals rapidly lost weight (Figure 6A)  
481 and succumbed to infection (Figures 6B and 6C) on day 4-5 post challenge. In contrast, all  
482 the T4-CoV-2- $\beta$  immunized mice only had minimal to no weight loss with a 100% survival  
483 rate over 21 days after the challenge. Furthermore, a high viral load in the lungs was  
484 observed in all the control animals on day 5 p.i., while no live virus was detected in the  
485 lungs of T4-CoV-2- $\beta$  vaccinated mice (Figure 6D).

486 *Histopathology:* As can be seen from Figure 6E, hACE2 transgenic mice treated with  
487 PBS and then challenged with WA-1/2020 strain showed significant interstitial  
488 inflammation in alveolar septa (black arrow, panel a, 100x) and alveolar hemorrhage.



489 However, there was no evidence of bronchovascular inflammatory infiltrates on day 5 p.i.  
490 At 200x, widening of interstitium with mononuclear inflammatory infiltrates (black arrow)  
491 and septal capillary congestion was clearly visible (blue arrow, panel b) in PBS treated and  
492 challenged mice.

493 Based on interstitial inflammation, animals receiving PBS or immunized with T4  
494 vector and then challenged had similar scores of  $40 \pm 7.1$  (PBS group) and  $46 \pm 18$  (T4 vector  
495 control group) on day 5 p.i., and the data were not significantly different ( $p=0.5$ , Student's  
496 t test). Further, on comparing unvaccinated animals (PBS + vector control groups together)  
497 with animals receiving the T4-CoV-2- $\beta$  vaccine, interstitial inflammation was significantly  
498 less in immunized mice ( $p=0.007$ , Mann-Whitney rank-sum test, the results were  
499 expressed as median, 25%, and 75% with values of 40, 30, and 52.5 for PBS and T4 vector  
500 control immunized and challenged mice compared to 20, 20, and 30 for the T4-CoV-2- $\beta$   
501 vaccinated and challenged animals) on day 5 p.i.

502 Although T4-CoV-2- $\beta$  i.n. vaccinated and challenged animals had mild interstitial  
503 inflammation (blue arrows, panel c), bronchovascular inflammatory infiltrates (black  
504 arrows, panel c, 100x) were clearly visible, not noted in unvaccinated and challenged  
505 mice. The bronchovascular infiltrates were mainly composed of lymphocytes and  
506 scattered macrophages (200x, panel d). Statistically, mice vaccinated with the T4 vector  
507 or T4-CoV-2- $\beta$  and then challenged had a higher level of bronchovascular infiltrates than  
508 PBS treated and infected animals, indicating that T4 phage could increase  
509 bronchovascular infiltrates in hACE2 transgenic mice. Importantly, at day 30 p.i., there

510 was no evidence of interstitial pneumonitis and only a mild bronchovascular  
 511 inflammation (black arrow, panel e, 40x) in T4-CoV-2- $\beta$  vaccinated and challenged mice.

512 These data indicated almost complete recovery of animals from bronchovascular  
 513 infiltrates.

514 Overall, our data indicated immunological responses induced by the vaccine cleared  
 515 the infection with 100% survival of the animals. T4 vector, like any other vectors, is  
 516 expected to activate some non-specific and non-damaging immune responses in the host  
 517 which subside as the vaccine clears from the host.

518

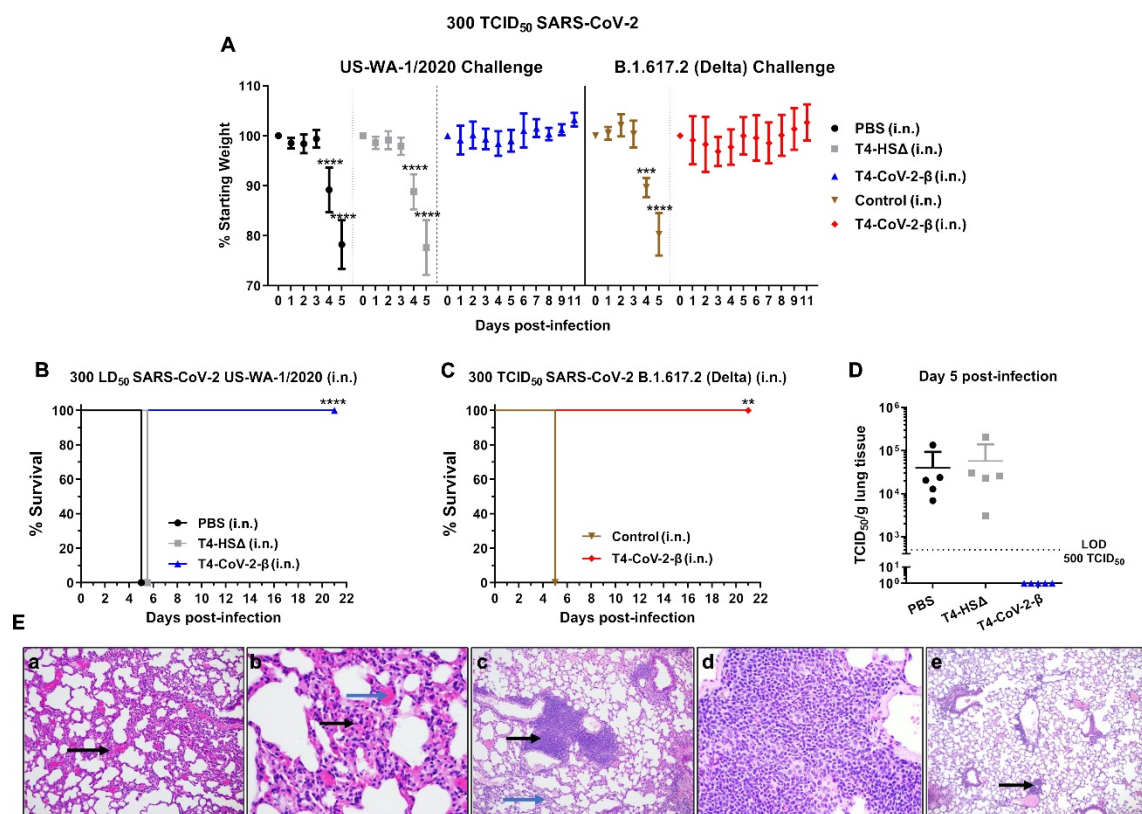

519  
 520 **Figure 6. Needle-free T4-CoV-2- $\beta$  vaccine provided complete protection against lethal**  
 521 **infection by ancestral SARS-CoV-2 strain as well as its Delta variant in hACE2 transgenic**  
 522 **mice.**

523 **(A)** Percentage starting body weight of immunized mice on various days after i.n.

524 challenge with 300 TCID<sub>50</sub> of WA-1/2020 strain or its Delta (B.1.617.2) variant.  
525 **(B and C)** Survival rate of hACE2 transgenic mice immunized with T4-CoV-2-β or T4-HSΔ  
526 vector control against WA-1/2020 strain (B) or its Delta variant (B.1.617.2) (C).  
527 **(D)** Viral burden (TCID<sub>50</sub>/g lung tissue) in the lung at 5 days post WA-1/2020 infection.  
528 Dotted lines indicate the limit of detection (LOD) of the assays.  
529 **(E)** Lung tissues obtained from the control (**a and b**) and T4-CoV-2-β (**c to e**) immunized  
530 mice (i.n.) were subjected to H&E (hematoxylin and eosin) and MOVAT staining for  
531 histopathological analyses, and representative photomicrographs from each group are  
532 shown.  
533 A, multiple Student's t-test using Holm-Sidak method to correct for multiple comparisons  
534 (n = 3-10); B to C, Kaplan Meier analysis with log-rank (Mantel-Cox) test (n = 3-10)  
535 \*\*P < 0.01, \*\*\*P < 0.001, \*\*\*\*P < 0.0001.

536

### 537 **The T4-CoV-2 vaccine is stable at ambient temperature**

538 The current mRNA vaccines require sub-freezing temperatures, and the adenovirus-  
539 based vaccines require cold temperatures, for storage and distribution. Bacteriophage T4  
540 being a resident of the gut has evolved a stable capsid structure to survive in a hostile  
541 environment. Indeed, the T4 phage is stable at extremes of pH and at ambient  
542 temperature, properties that are particularly suitable for storage and extending the life  
543 of a vaccine (Jończyk et al., 2011).

544 To determine the stability of the T4-CoV-2-β, the vaccine preparations in PBS were  
545 stored at 4°C and room temperature (22°C), and samples were taken at various time  
546 points and analyzed for stability and functionality. Stability was assessed by any reduction  
547 in the amount of intact spike protein associated with phage (due to dissociation), and/or  
548 appearance of any degraded protein fragments (due to nonspecific proteolysis), whereas  
549 functionality was assessed by the ability of the displayed S-trimers to bind to hACE2  
550 receptor. The data showed (Figures 7A to 7D) that the T4-CoV-2-β vaccine, by any of these  
551 criteria, was completely stable and functional for at least 10-weeks of storage at 4°C or

552 at 22°C. Furthermore, the backbone phage displaying the SpyCatcher domain as part of  
 553 the hard-wired recombinant phage, i.e., prior to conjugation with S-trimer, also remained  
 554 completely stable and functional.

555 These data demonstrated stability advantage of the phage T4-CoV-2-β vaccine and  
 556 coupled with the needle-free i.n. route of administration, this platform provides  
 557 especially useful features for rapid vaccine distribution during a pandemic (Kim et al.,  
 558 2021).

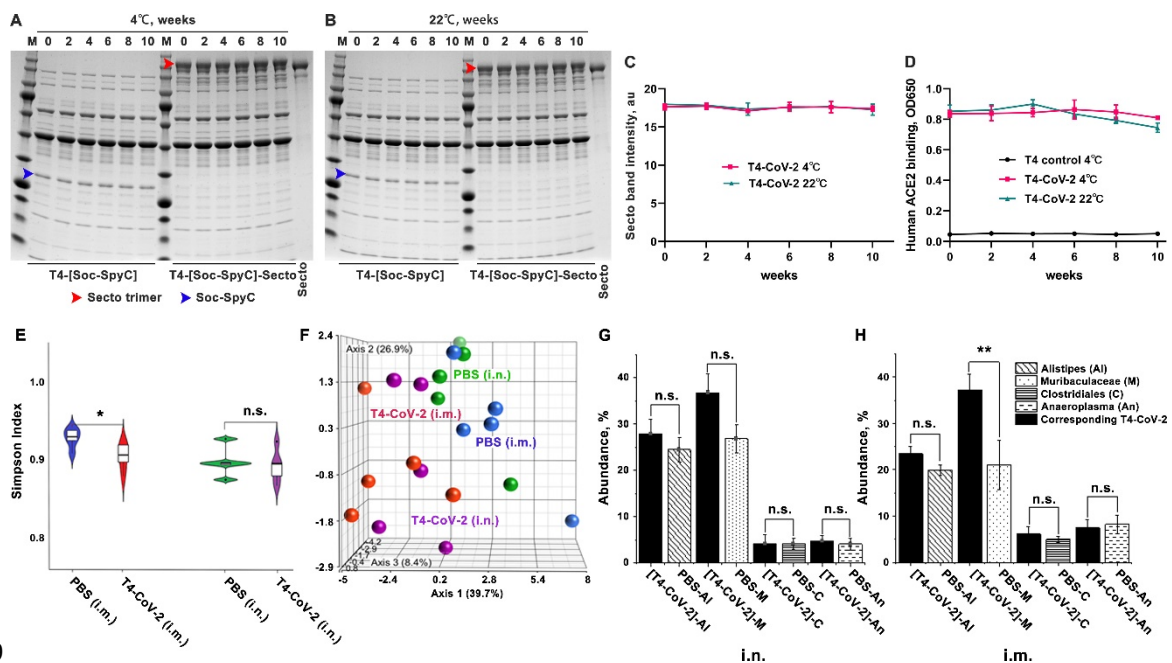

559 **Figure 7. T4-CoV-2 vaccine is stable at ambient temperature and does not influence the**  
 560 **microbiome community in mice.**

562 **(A and B)** The stability of T4-CoV-2 and T4-(Soc-SpyC) phages for 10-weeks at 4°C (A) or  
 563 22°C (B). Samples were taken every two weeks and analyzed for stability by SDS-PAGE.  
 564 The blue and red arrowheads indicate the bands of Soc-SpyCatcher and covalently  
 565 conjugated Secto protein, respectively.

566 **(C)** Quantification of the displayed Secto band in T4-CoV-2 vaccine stored at 4°C or 22°C.

567 **(D)** Comparison of binding efficiency of T4-CoV-2 phage to hACE2 receptor after storage  
 568 at 4°C or 22°C.

569 **(E)** The correlated distribution of the Simpson diversity index of microbiomes from PBS  
 570 control and T4-CoV-2 vaccinated groups when immunization occurred by the i.n. or the  
 571 i.m. route. The measure of diversity included number and relative species abundance.

572 **(F)** Summary of individual Euclidian distance as a 3D resemblance matrix of microbial  
573 species in the tested groups.

574 **(G and H)** Specific effect of the vaccination of T4-CoV-2 and PBS control on the bacterial  
575 genera of the microbiome. The abundance of the gut microbiota following i.n. (G) or i.m.  
576 (H) administration of the T4-CoV-2 vaccine and the PBS control are shown.

577

#### 578 **T4-CoV-2 vaccination does not influence the microbiome community**

579 Finally, we determined if T4-CoV-2 vaccination impacted the microbiome community.

580 DNA was extracted from the fecal matter of individual mice (n=5/group) and was  
581 sequenced for 16S rRNA gene and analyzed.

582 *Violin plot:* The violin plot in Figure 7E showed the correlated distribution of the  
583 Simpson diversity index of microbiomes in the test groups. The measure of diversity  
584 included number and relative species abundance. As noted, the i.n. route of  
585 administration did not alter the Simpson diversity of the microbial species recovered  
586 from the PBS control versus the T4-CoV-2 vaccine groups of mice, unlike when i.m. route  
587 of vaccination was used. These results indicated that i.n. vaccination did not significantly  
588 affect the number and relative abundance of the gut microbiota.

589 *Principal coordinate analysis (PCoA):* Figure 7F summarized individual Euclidian  
590 distance as a 3D resemblance matrix of microbial species. The data indicated that the  
591 relative distances based on the number between species during both routes of  
592 immunization were similar, but there was a significant difference in species diversity  
593 when immunization occurred via the i.m. route (PBS control versus T4-CoV-2 groups).  
594 However, this was not the case during i.n. route for immunization as there was a lack of  
595 significant differences among species.

596        *Specific effect on the bacterial genera of the microbiome:* Figures 7G and 7H showed  
597 abundance of the gut microbiota. The Tukey mean comparison method between the T4-  
598 CoV-2 and PBS groups for the top four genera (*Alistipes*, *Muribaculaceae*, *Clostridiales*,  
599 and *Anaeroplasma*) indicated no significant differences in the gut microbiota even  
600 though there were few differences in numbers (*e.g.*, for *Alistipes* and *Muribaculaceae*)  
601 when vaccine was administered by the i.n. route (Figure 7G). However, a significant  
602 difference in the *Muribaculaceae* genus was noted when T4-CoV-2 vaccine was delivered  
603 by the i.m. route (Figure 7H). These same differences were observed among the  
604 *Bacteroidetes* phylum indicating that i.m. administration of the T4-CoV-2 vaccine had a  
605 more significant impact on the gut microbiota. These trends were also reflective  
606 upstream of the hierarchy from families to the phylum of the recovered gut microbiota.  
607 Post-vaccination microbiota perturbation was previously reported during early microbial  
608 and immunological maturation stages in humans (Ruck et al., 2020). Similarly, Chen et al.,  
609 2021 identified postvaccination dysbiosis as a significant problem in developing cellular  
610 immunity in COVID-19 vaccines, which can be corrected by introducing prebiotics and  
611 probiotics oral supplements after vaccination (Chen et al., 2021). However, notably, the  
612 T4-based COVID-19 vaccine administered by the i.n. route seemed to circumvent this  
613 effect on the microbiota.

614

615

616

## 617 **DISCUSSION**

618       A next-generation COVID-19 vaccine that would elicit local mucosal responses in  
619 addition to strong systemic immunity is most desired to control SARS-CoV-2 infections  
620 and in general, any mucosally transmitted infection (Alu et al., 2022; Borges et al., 2010;  
621 Lavelle and Ward, 2021). This is particularly relevant at this stage of the COVID-19  
622 pandemic, in view of the current evolutionary trajectory of the virus selecting highly  
623 transmissible variants such as Omicron BA.1 and BA.2.

624       The sticky mucous layers in the nasal epithelia present barriers to pathogens and  
625 possibly interfere with the ability of vaccines to access and activate the mucosal immune  
626 system. This may account for poor immunogenicity of most injectable vaccines when  
627 administered intranasally (Focosi et al., 2022; Tiboni et al., 2021). At present, of 195  
628 COVID-19 vaccine candidates in clinical trials, only fourteen are intranasal vaccines. Most  
629 of them are based on engineered live viruses that can efficiently infect human cells and  
630 intracellularly express spike or RBD antigens from the delivered genes. These include  
631 human or chimpanzee adenoviruses (Hassan et al., 2020; Hassan et al., 2021; King et al.,  
632 2020; Lapuente et al., 2021; van Doremalen et al., 2021a), live-attenuated influenza virus  
633 (An et al., 2021; Liu et al., 2021), live-attenuated Newcastle Disease Virus (Park et al.,  
634 2021; Sun et al., 2021), and lentivirus (Ku et al., 2021). However, these eukaryotic viral  
635 vaccines still pose a safety concern, pre-existing immune responses, and a risk, albeit very  
636 low, of reversion.

637 Our studies established a prokaryotic, noninfectious, bacteriophage T4 mucosal  
638 vaccine delivery platform that can be engineered to generate stable, needle- and  
639 adjuvant-free, multicomponent vaccines against COVID-19 or any emerging and  
640 pandemic pathogen. Presence of ~17-nm long Hoc fibers on T4 capsid surface that could  
641 interact with mucin glycoproteins and S-trimers binding to ACE2 receptors provide  
642 distinct advantages for intranasal delivery and presentation to host's mucosal immune  
643 system. Indeed, a series of datasets demonstrate that the T4-CoV-2 nanoparticle vaccine  
644 containing arrays of ~100 copies of S-trimers on T4 capsid exterior and ~100 copies of NP  
645 packaged in its interior when administered to mice intranasally stimulated all arms of the  
646 immune system, including strong mucosal immunity that injectable vaccines do not  
647 induce.

648 The immune responses stimulated by the T4 based COVID-19 vaccine were broad  
649 and included: Th1 and Th2 derived IgG and IgA antibodies in sera, virus neutralizing  
650 antibodies, CD4<sup>+</sup> helper and effector T cells and CD8<sup>+</sup> killer T cells, Th1-biased cytokines,  
651 and mucosal IgG and sIgA antibodies in BALF. While most of these immune responses  
652 were triggered by both i.n. and i.m. routes of vaccine administration, the stimulation was  
653 considerably stronger by i.n. immunization. Consistently, weight losses following  
654 challenge were significantly lower in the i.n. vaccinated mice than the i.m. mice, although  
655 both routes induced apparent sterilizing immunity showing no virus load in the lungs of  
656 vaccinated mice. Remarkably, however, the mucosal sIgA in BALF was stimulated only by  
657 i.n. vaccination. The sIgA is supposed to be effective at the entry point by interfering with



658 virus acquisition and at the exit point by clearing the invaded pathogen (Figure 1) (Sterlin  
659 et al., 2021a; Wang et al., 2021). This pattern of broad responses was consistently  
660 observed for both WT as well as the Beta-variant S-trimers and in conventional BALB/c  
661 mice as well as hACE2 transgenic mice. The evidence, thus, is compelling to suggest that  
662 vaccine-induced mucosal immunity is a prominent feature of the needle-free  
663 bacteriophage T4 nanoparticle vaccine, which could be further exploited for designing  
664 vaccines against other respiratory infections (Excler et al., 2021).

665 Strikingly, the T4-CoV-2 vaccine induced similar levels of serum virus neutralizing  
666 antibody titers against the ancestral WA-1/2020 strain and its two VOCs (B.1.135 Beta  
667 and B.1.617.2 Delta) which can significantly escape immune responses by the existing  
668 mRNA or adenovirus vaccines (Kroidl et al., 2021; Mlcochova et al., 2021; Zinatizadeh et  
669 al., 2022). Consistently, our vaccine protected mice from challenge by both the WA-  
670 1/2020 strain and its Delta (B.1.617.2) variant, considered thus far the most lethal strain.  
671 Additionally, the T4-CoV-2 vaccine also induced significant but somewhat diminished  
672 neutralizing antibody titers against the Omicron variant which has the greatest number  
673 of mutations and immune-escaping capacity reported to date (Ying et al., 2022).  
674 Importantly, similar levels of neutralizing antibody titers were measured in BALF against  
675 both WA-1/2020 isolate and its Omicron variant. It is intriguing why the neutralization  
676 activity induced by T4-CoV-2 vaccination is so broad. One possible reason might be the  
677 presence of high levels of sIgA in sera and in BALF, which is reported to be more potent  
678 than IgG in neutralizing SARS-CoV-2 virus (Sterlin et al., 2021b).

679 Notably, the T4-CoV2 nanoparticle vaccine is also a potent inducer of cellular  
680 immunity. Our studies demonstrated that both routes of immunization (i.n. and i.m.)  
681 induced the enhanced release of pro-inflammatory/anti-inflammatory as well as Th1/Th2  
682 cytokines in BALB/c and hACE2 transgenic mice. Interestingly, i.n. route of immunization  
683 induced greater cellular responses, especially Th1, compared to i.m. route of vaccination.  
684 Th1 cells and cytotoxic T lymphocytes are primarily responsible for host defense against  
685 viral infections, and the role of Th2 cells in recruiting different types of innate immune  
686 cells to kill invading pathogens is also well documented (Sallusto, 2016). A Th1 cell-biased  
687 response or balanced Th1 /Th2 cell response has also been reported by others upon  
688 immunization of mice, hamsters, and macaques with effective COVID-19 vaccines (Bos et  
689 al., 2020; Corbett et al., 2020; DiPiazza et al., 2021; Kalnin et al., 2021; Sadarangani et al.,  
690 2021; Vogel et al., 2020; (Zhang et al., 2022) . Therefore, a combination of producing  
691 neutralizing antibodies and activation of antigen-specific T cells may act in concert to  
692 control SARS-CoV-2 infection in our mouse models.

693 Additionally, we also observed Th17 immune responses elicited by T4-COVID  
694 vaccine. Th17 cells are being recognized as an important T helper subset for immune-  
695 mediated protection, and unbalanced Th17 responses are implicated in the  
696 pathogenesis of several autoimmune and allergic disorders (Tesmer et al., 2008).  
697 Involvement of IL-17 in priming enhanced chemokine and G-CSF production in the lung  
698 during bacterial pneumonia and its ability to promote antimicrobial responses against  
699 pathogens of viral, bacterial, parasitic, and fungal etiology has been reported (Anipindi

700 et al., 2019; Guo et al., 2011; Ma et al.). For example, mucosal delivery of *M. tuberculosis*  
701 subunit vaccine has been shown to provide IL-17 dependent protection of mice against  
702 pulmonary tuberculosis compared to when the vaccine was delivered by the parenteral  
703 route (Counoupas et al., 2020). Since the T4-COVID vaccine provided complete  
704 protection to mice with much reduced histopathological lesions, our data support the  
705 notion that a delicate balance of Th1/Th2/Th17 and mucosal immune responses were  
706 critical in developing effective COVID-19 vaccines.

707       The T4-CoV-2 vaccine is a safe and stable vaccine. A noninfectious phage T4-CoV-2  
708 vaccine with no tropism to human cells and no use of adjuvants or chemical stimulants  
709 represent significant advantages. In fact, our previous studies showed that adding  
710 adjuvants such as alum or liposomes did not further enhance the levels of immune  
711 responses (Rao et al., 2011a; Zhu et al., 2021). Microbiome analyses showed no  
712 significant changes in the microbiome diversity in mice vaccinated with the T4-CoV-2  
713 vaccine. In human clinical trials and hundreds of T4 phage vaccine immunizations over  
714 the years involving mice, rats, rabbits, and macaque animal models and diverse antigens  
715 such as anthrax, plague, and HIV did not identify any significant side effects (Li et al., 2021;  
716 Rao et al., 2011b; Tao et al., 2013; Tao et al., 2018a; Zhu et al., 2019). Furthermore, the  
717 T4 phage is one of the most stable virus scaffolds known (Jończyk et al., 2011) and our  
718 stability studies showed that the T4-CoV-2 vaccine was completely stable at ambient  
719 temperature for at least 10-weeks. Therefore, the T4 vaccine that requires no cold chain

720 provides an excellent alternative for global distribution and vaccination of still  
721 unvaccinated populations across the world.

722       Additionally, the T4-CoV-2 vaccine is a strong candidate as an effective booster  
723 vaccine. Before this pandemic ends, an additional booster will likely be needed to protect  
724 the global population from emerging variants. None of the licensed vaccines used  
725 worldwide are needle-free or generate significant mucosal responses, which are critically  
726 important for minimizing person-to-person transmission. The T4-CoV-2 vaccine that can  
727 boost not only the antibody and T cell immune responses but also induce strong mucosal  
728 immunity would be the most beneficial one. Furthermore, more than a billion  
729 vaccinations across the globe received the adenovirus-based vaccines, which also  
730 stimulate strong anti-vector responses. This pre-existing immunity, particularly the  
731 adenovirus capsid neutralizing antibodies, limit the effectiveness of another booster dose  
732 using the same vaccine, particularly in the elderly (Chevallard et al., 2022; Lanzi et al.,  
733 2011), because vaccine delivery requires efficient infection of human cells which would  
734 be compromised by immune clearance (Dicks et al., 2022). Since there is no significant  
735 preexisting immunity in humans for T4 (Bruttin and Brussow, 2005), the T4-CoV-2 vaccine  
736 would be an excellent alternative to boost more than a billion people who already  
737 received the adenoviral vaccines.

738       In conclusion, we have established a bacteriophage T4-based, protein vaccine  
739 platform, complementing the current mRNA and DNA vaccine platforms but with certain  
740 advantages in terms of route of administration, engineerability, breadth of immune

741 responses, mucosal immunity, and vaccine stability. In particular, broad virus  
742 neutralization activity, both systemic and mucosal, T cell immunity, complete protection,  
743 and apparent sterilizing immunity, all induced by the same vaccine mean that the T4-CoV-  
744 2 vaccine might be able to block viral entry (host's viral acquisition) and viral exit (host's  
745 viral shedding), minimizing person to person viral transmission. However, additional  
746 studies in animal models (hamsters and macaques), Phase 1 human clinical trials, and  
747 GMP manufacturing processes are needed to translate the vaccine into mass production  
748 and global distribution. These efforts are currently underway and crucial as more than 10  
749 billion doses of the vaccines are needed across the globe, particularly in middle-to-low-  
750 income countries where the affordability of the current vaccines is a big concern due to  
751 cost.

752

## 753 **METHODS**

### 754 **T4 bacteriophages and SARS-CoV-2 strains**

755 The T4-CoV-2 vaccine is a recombinant T4 phage displaying 100 copies of prefusion-  
756 stabilized SARS-CoV-2 spike protein ectodomain trimers (S-trimers) on the surface of 120  
757 x 86 nm phage capsid. It also harbors SARS-CoV-2 nucleocapsid protein (NP) packaged in  
758 its core and a 12-amino acid (aa) peptide of the putative external domain of E protein (Ee)  
759 on the capsid surface. The S-trimers were displayed through interaction with the small  
760 outer capsid protein (Soc) which is attached to EXPiCHO-expressed S-trimers via  
761 SpyCatcher-SpyTag conjugation. The Ee peptide was attached through fusion to the highly

762 antigenic outer capsid protein (Hoc). The NP, Ee, and SpyCatcher were hard-wired into T4  
763 genome by CRISPR engineering and incorporated into the phage nanoparticle structure  
764 during phage infection to make vaccine production easy. The T4 phage without carrying  
765 the SARS-CoV-2 components was used as a control for the study.

766 Mouse adapted SARS-CoV-2 MA10 strain is a gift from Dr. R. Baric, University of  
767 North Carolina, Chapel Hill, NC. The first COVID-19 patient isolate SARS-CoV-2 US-WA-  
768 1/2020, its Beta (B.1.351), Delta (B.1.617.2), and Omicron (B.1.1.529) VOCs were  
769 obtained through CDC and available at the Galveston National Laboratory, UTMB.

#### 770 **T4 bacteriophage production, purification, display, and stability evaluation**

771 Bacteriophages T4-NP-Ee-(Soc-SpyCatcher) and T4-HS $\Delta$  were produced in *E. coli* strain  
772 B40 and purified by two rounds of CsCl gradient centrifugation as described previously  
773 (Zhu et al., 2021; Zhu et al., 2022). The purified phages were passed through a 0.22- $\mu$ m  
774 filter to remove any minor bacterial contaminants. *In vitro* display of Secto or Secto- $\beta$   
775 trimer on the T4-NP-Ee-(Soc-SpyCatcher) phage was assessed by co-sedimentation as  
776 described previously (Zhu et al., 2021). The phage concentration and copy numbers of  
777 displayed antigens were quantified by 4-20% SDS-PAGE. The copy numbers of displayed  
778 antigens per capsid were calculated using gp23 (major capsid protein; 930 copies) or gp18  
779 (major tail sheath protein; 138 copies) as internal controls and S-trimer protein standard.  
780 The copies of the phage-packaged NP protein were quantified by Western blotting using  
781 the commercial rabbit anti-NP antibody (Sino Biological) and NP protein standard  
782 (ThermoFisher Scientific) as previously described (Zhu et al., 2021).

783 For stability evaluation, the T4-CoV-2 vaccine phage (T4-[Soc-SpyC]-Secto), as well  
784 as the T4 backbone phage (T4-[Soc-SpyC]), were flash-frozen at -70°C at the time zero, as  
785 100% controls. Two sets of the same phages were stored at 4°C or 22°C, and samples  
786 were taken at two-week intervals for ten weeks and were flash-frozen at -70°C. All the  
787 samples were thawed and analyzed together for stability and functionality by SDS-PAGE  
788 and human ACE2 receptor binding assay as previously described (7). After Coomassie  
789 Blue R-250 (Bio-Rad) staining and destaining, the displayed S-trimer protein bands on  
790 SDS-PAGE gels were scanned and quantified by ChemiDoc MP imaging system (Bio-Rad)  
791 and ImageJ.

#### 792 **Beta-S-trimer (tag-free) purification**

793 To obtain prefusion-stabilized native-like trimers, Secto or Secto- $\beta$  trimers were  
794 expressed from a recombinant plasmid in ExpiCHO mammalian host cells. The CHO cell  
795 growth and Spike recombinant plasmid transfection were performed according to the  
796 ExpiCHO expression system User Guide (MAN0014337, ThermoFisher website). The S-  
797 trimer expression was under the control of a strong CMV promoter. Cultures were  
798 harvested 8 days after transfection by centrifuging the cells at 3000 *g* for 20 min at 4°C.  
799 The supernatant (culture medium) containing the expressed S-trimers was recovered and  
800 clarified through a 0.22  $\mu$ m filter (Corning Inc.) for column purification.

801 The pH of the filtered supernatant (250 ml) was first adjusted to 8 using 1M Tris-HCl,  
802 pH 8. Then the supernatant was loaded onto two HiTRAP Q-FF columns connected in  
803 tandem and previously equilibrated with wash buffer (100 mM NaCl, 50 mM Tris-HCl, pH

804 8). The sample was loaded at a flow rate of 1 mL/min, using AKTA Prime-Plus liquid  
805 chromatography system (GE Healthcare). The flow-through was collected and diluted  
806 with 50 mM Tris-HCl, pH 8 buffer at 1:1 ratio and loaded onto the HiTRAP Q-HP column  
807 at a flow rate of 1 mL/min, followed by washing the column with 50 mM NaCl, 50 mM  
808 Tris-HCl, pH 8 wash buffer until the absorbance reached the baseline. The trimers were  
809 eluted using a 50-600 mM linear gradient of salt in 50 mM Tris-HCl, pH 8 (90 mL total  
810 gradient). The peak fractions were run on a 4-20% gradient SDS-PAGE to select fractions  
811 with a high ratio of trimers to contaminants. The selected fractions were then pooled and  
812 concentrated using 100 kDa filters (Millipore) and loaded to a Hi-Load 16/600 Superdex-  
813 200 pg (preparation grade) size-exclusion chromatography column (GE Healthcare)  
814 equilibrated with the gel filtration buffer (100 mM NaCl, 50 mM Tris-HCl, pH 8) to further  
815 separate the low molecular weight contaminants and obtain purified trimers (ÄKTA FPLC,  
816 GE Healthcare). Eluted trimer fractions were assessed on the SDS-PAGE gel to determine  
817 the purity and selected fractions were pooled and passed through 0.22 µm filter to  
818 sterilize the sample. If needed, the trimers were concentrated using 100 kDa centrifugal  
819 filters at 3,500 RPM in a swing bucket rotor. The concentration of the Secto trimers was  
820 kept around 1-2 mg/mL. Protein aliquots (1 mL size) were made, flash-frozen in liquid  
821 nitrogen, and stored at -80°C until use.

## 822 **Mouse immunizations**

823 We followed the recommendations of the NIH for mouse studies (the Guide for the Care  
824 and Use of Laboratory Animals). All animal experiments were approved by the



825 Institutional Animal Care and Use Committee of the Catholic University of America  
826 (Washington, DC) (Office of Laboratory Animal Welfare assurance number A4431-01) and  
827 the University of Texas Medical Branch (Galveston, TX) (Office of Laboratory Animal  
828 Welfare assurance number A3314-01). The SARS-CoV-2 virus challenge studies were  
829 conducted in the animal BSL-3 (ABSL-3) suite at UTMB. Five-week-old female BALB/c  
830 (Jackson Laboratory) or hACE2 transgenic mice AC70 (Taconic Biosciences) were  
831 randomly grouped (5-10 animals per group) and allowed to acclimate for 14 days. The  
832 phage T4-CoV-2 vaccine was administered by either the i.m. or the i.n. route into the hind  
833 legs of mice or naris, respectively. For 2-dose regimen, animals received vaccination at  
834 days 0 (prime) and 21 (boost), while for 1-dose regimen, the vaccine was given at day 21.  
835 Three different number of phage particles possessing 0.8, 4.8, and 20  $\mu\text{g}$  of S-trimer  
836 antigens representing  $\sim 1.0 \times 10^{10}$ ,  $6 \times 10^{10}$  and  $2.5 \times 10^{11}$  phage particles, respectively,  
837 were used. Negative control mice received the same volume of PBS or the same amount  
838 of T4 control phage (T4 control). Blood was drawn from each animal on day 0 (pre-bleed)  
839 and day 42, the isolated sera were stored at  $-80^{\circ}\text{C}$  until further use.

#### 840 **Bronchoalveolar lavage fluids collection**

841 On day 21 after boosting, bronchoalveolar lavage fluids (BALF) were obtained from  
842 immunized and control animals by following the protocol as previously described with  
843 slight modifications (Van Hoecke et al., 2017). Briefly, the salivary glands were dissected  
844 to expose the trachea of euthanized mice ( $n=5/\text{group}$ ). A small incision was made on the  
845 ventral face of the trachea and a blunt 26G needle was inserted into the trachea and

846 secured by tying the trachea around the catheter using the floss placed underneath the  
847 trachea. An aliquot (600  $\mu$ L) of PBS loaded into a 1mL syringe was flushed in the lungs  
848 and BALF was collected.

#### 849 **ELISA determination of IgG, IgG subtypes, and IgA antibodies**

850 ELISA plates (Evergreen Scientific) were coated with 100  $\mu$ L (1  $\mu$ g/mL) per well of SARS-  
851 CoV-2 Secto protein (Sino Biological), SARS-CoV-2 Secto- $\beta$  protein, SARS-CoV-2 RBD-  
852 untagged protein (Sino Biological), SARS-CoV-2 NP (Sino Biological), or SARS-CoV-2 E  
853 protein (1 to 75 amino acids) (ThermoFisher Scientific) in coating buffer [0.05 M sodium  
854 carbonate-sodium bicarbonate (pH 9.6)] at 4°C for overnight incubation. The plates were  
855 washed twice with PBS buffer, followed by blocking with 200  $\mu$ L per well of PBS (pH 7.4)-  
856 5% BSA (bovine serum albumin) buffer at 37°C for 2 h. Serum and BALF samples were  
857 diluted with a 5-fold dilution series beginning with an initial 100-fold dilution in PBS-1%  
858 BSA. One hundred microliters of diluted serum or BALF samples were added to each well,  
859 and the plates were incubated at 37°C for 1 h. The plates were washed five times with  
860 PBST (PBS + 0.05% Tween 20). Then, the secondary antibody was added at 1:10,000  
861 dilution in PBS-1% BSA buffer (100  $\mu$ L per well) using either goat anti-mouse IgG-HRP,  
862 goat anti-mouse IgG1-HRP, goat anti-mouse IgG2a-HRP, or goat anti-mouse IgA-HRP  
863 (Thermo Fisher Scientific). After incubation for 1 h at 37°C and five washes with PBST  
864 buffer, plates were developed using the TMB (3,3',5,5'-tetramethylbenzidine) Microwell  
865 Peroxidase Substrate System (KPL, 100  $\mu$ L) for 5 to 10 min. The enzymatic reaction was  
866 stopped by adding 100  $\mu$ L TMB BlueSTOP solution (KPL). The absorbance of optical

867 density at 650 nm was read within 30 min on a VersaMax spectrophotometer. The  
868 endpoint titer was defined as the highest reciprocal dilution of serum that gives an  
869 absorbance more than twofold of the mean background of the assay.

#### 870 **Virus neutralization assay**

871 Neutralizing antibody titers in mouse immune sera against SARS-CoV-2 US-WA-1/2020 or  
872 its Beta, Delta, or Omicron variants were quantified by using Vero E6 cell-based  
873 microneutralization assay in the BSL-3 suite as previously described (Zhu et al., 2021).  
874 Briefly, serially 1:2 or 1:3 downward diluted mouse sera (original dilution 1:10 or 1:20)  
875 that were decomplexed at 56°C for 60 min in a 60 µl volume were incubated for 1 h  
876 at room temperature (RT) in duplicate wells of 96-well microtiter plates that contained  
877 120 infectious SARS-CoV-2 virus particles in 60 µL in each well. After incubation, 100 µL  
878 of the mixture in individual wells was transferred to Vero E6 cell monolayer grown in 96-  
879 well microtiter plates containing 100 µL of MEM/2% fetal bovine serum (FBS) medium in  
880 each well and was cultured for 72 h at 37°C before assessing the presence or absence of  
881 cytopathic effect (CPE). Neutralizing antibody titers of the tested specimens were  
882 calculated as the reciprocal of the highest dilution of sera that completely inhibited virus-  
883 induced CPE.

#### 884 **T cell proliferation and phenotypes, and cytokine analysis**

885 To measure T-cell proliferation, bromodeoxyuridine (BrdU), a thymidine analog,  
886 incorporation method was used. Briefly, spleens were aseptically removed from 5  
887 animals of each indicated group on day 21 after the last immunization dose. Spleens were

888 homogenized and passed through a 70  $\mu\text{m}$  cell strainer to obtain single cell suspension  
889 in RPMI 1640 cell culture medium. Splenocytes were then seeded into 24 well tissue  
890 culture plates at a density of  $2.0 \times 10^6$  cells/well (4 wells/mouse) and stimulated with  
891 either SARS-CoV-2 S-trimer (10-100  $\mu\text{g}/\text{mL}$ ) or SARS-CoV-2 PepTivator<sup>®</sup> Peptide S and NP  
892 protein Pools (10  $\mu\text{g}/\text{mL}$  each, Miltenyi Biotec) for 72 h at 37°C. BrdU (BD Bioscience) was  
893 added to a final concentration of 10  $\mu\text{M}$  during the last 18 h of incubation with the  
894 stimulants to be incorporated into the splenocytes (Endl et al., 1997; Penit, 1986).  
895 Subsequently, the BrdU-labeled splenocytes were surface stained for T-cell (CD3e-APC;  
896 eBioscience) marker after blocking with anti-mouse CD16/32 antibodies (BioLegend).  
897 Cells were then permeabilized and treated with DNase to expose BrdU epitopes followed  
898 by anti-BrdU-FITC and 7-AAD (7-amino-actinomycin D) staining by using BD Pharmingen  
899 FITC BrdU Flow Kit. The splenocytes were then subjected to flow cytometry, and data was  
900 analyzed as we previously described (Kilgore et al., 2021a; Kilgore et al., 2021b; Tiner et  
901 al., 2016). The percent of BrdU positive cells in CD3 positive populations were calculated  
902 using FACSDiva software.

903 To measure T-cell phenotypes, the above overnight (16 h) stimulated splenocytes  
904 were similarly blocked with anti-mouse CD16/32 antibodies (BioLegend) and stained with  
905 Fixable Viability Dye eFluor<sup>™</sup> 506 (eBioscience) followed by APC anti-mouse CD3e  
906 (eBioscience), PE/Dazzle 594 anti-mouse CD4 (BioLegend), FITC anti-mouse CD8  
907 (BioLegend) for CD3, CD4 and CD8 T-cell surface markers, respectively. Cells were then  
908 permeabilized for intracellular staining with PerCP/Cy5.5 anti-mouse IFN $\gamma$ , PE/Cy7 anti-

909 mouse IL-17A (BioLegend), eFluor 450 anti-mouse TNF $\alpha$  (eBioscience), and analyzed by  
910 flow cytometry.

911 To assess cytokine production, cell supernatants were collected after stimulation  
912 with S-trimers as described above for 72 h at 37°C. Cytokines in the supernatants were  
913 then measured by using Bio-Plex Pro mouse cytokine 23-plex assay (Bio-Rad  
914 Laboratories). Likewise BALF from control and immunized mice was used to measure  
915 cytokines.

#### 916 **16S rRNA gene sequencing and microbiome analysis**

917 Fecal pellets were collected from 5 animals of each indicated group on day 21 after the  
918 last immunization dose. Total genomic DNA was extracted from the fecal matter using  
919 methods previously described (Salonen et al., 2010; Yu and Morrison, 2004). DNA  
920 samples were further purified using a DNA Clean and Concentrator kit (Zymo Research).  
921 The above extracted microbial DNA was then subjected to amplification and sequencing  
922 of the V4 region of the 16S rRNA gene by using a NEXTflex 16S V4 Amplicon Seq kit 2.0  
923 (PerkinElmer), and sequences were generated on the Illumina MiSeq platform (Illumina).  
924 Raw reads were filtered using the Lotus pipeline (Hildebrand et al., 2014), followed by de  
925 novo clustering to operational taxonomic units (OTUs) at 97% sequence identity with  
926 UPARSE (Edgar, 2013). Bacterial diversity and community composition were evaluated  
927 using QIIME v1.8 (Caporaso et al., 2010), and taxonomy assignment of the representative  
928 sequence for each OTU was completed using the RDP classifier algorithm and the SILVA  
929 reference database (v123) (Quast et al., 2013).

930 **Animal challenges**

931 Immunized and control mice were first ear tagged and their initial weights recorded. Mice  
932 were then anesthetized and intranasally challenged with 60  $\mu$ l of either SARS-CoV-2  
933 MA10 strain for conventional mice or SARS-CoV-2 US-WA-1/2020 strain or the Delta  
934 variant (B.1.617.2) for hACE2 transgenic mice. The challenge dose was  $\sim 10^5$  median tissue  
935 culture infectious dose (TCID<sub>50</sub>). For hACE2 transgenic mice, the challenge dose was 300  
936 TCID<sub>50</sub>. The animals were monitored for the onset of morbidity (weight loss and other  
937 signs of illness, every day) and mortality over the indicated period.

938 **Histopathology Studies**

939 Lung tissues were excised from euthanized animals (immunized and control) at 2-5 days  
940 post challenge and immersion fixed in 10% neutral buffered formalin. After fixation,  
941 tissues were sectioned at 5  $\mu$ m, mounted on glass slides, and stained with hematoxylin  
942 and eosin (HE) and MOVAT for histopathological analysis (Department of Pathology,  
943 UTMB). Staining with MOVAT helps in better visualizing tissue architecture.  
944 Histopathological analysis of lung sections from Balb/c mice was performed based on  
945 three parameters: mononuclear inflammatory infiltrate around bronchovascular bundles,  
946 interstitial inflammation, and alveolar exudate/hemorrhage. Scores for bronchovascular  
947 infiltrates ranged from 0 (normal) to 3, as follow: 1-Occasional mononuclear infiltrates,  
948 5-10 microns thick; 2: multifocal mononuclear infiltrates, 5-20 microns thick; and 3-  
949 Diffuse mononuclear infiltrates, > 20 microns thick. The scores for interstitial  
950 inflammation were as follow:1-occasional areas of widened alveolar septa; 2. multifocal

951 areas of widened alveolar septa; and 3-diffused widening of alveolar septa. For alveolar  
952 exudate/hemorrhage, the scores were: 1- occasional areas of alveolar  
953 exudate/hemorrhage; 2-multifocal areas of alveolar exudate/hemorrhage; and 3-  
954 diffused areas of alveolar exudate/hemorrhage. The combined scores for the vector  
955 control group and the T4-CoV-2 vaccine group were analyzed using the Student's t-test.

956 For hACE2 transgenic mice, histopathological analysis was performed based on  
957 these parameters: interstitial inflammation/alveolar exudate and mononuclear  
958 inflammatory infiltrate around bronchovascular (BV) bundles. Interstitial  
959 inflammation/alveolar exudates were scored based on percentage of the lung surface  
960 area involved (0-100%), while scores for BV infiltrate ranged from 0 (normal) to 3 as follow:  
961 1-occasional mononuclear infiltrates, 5-10 microns thick; 2-multifocal mononuclear  
962 infiltrates, 5-20 microns thick; and 3-Diffused mononuclear infiltrates, > 20 microns thick.  
963 The scores for the intranasal PBS control group, T4 vector control group, and the T4-CoV-  
964 2 vaccinated group were analyzed using the Student's t-test if the groups passed the  
965 normality test (Shapiro-Wilk) or Mann-Whitney Rank sum test if the normality test failed.

#### 966 **Statistics and software**

967 Statistical analyses were performed by GraphPad Prism 9.0 software using one-way or  
968 two-way analysis of variance (ANOVA) with Tukey's *post hoc* test or multiple t-test  
969 according to the generated data. We used Kaplan-Meier with log-rank (Mantel-Cox) test  
970 for animal survival studies. Significant differences between two groups were indicated by  
971 \* $P < 0.05$ , \*\* $P < 0.01$ , \*\*\* $P < 0.001$ , and \*\*\*\* $P < 0.0001$ . ns indicates not significant.

972 Photo credit: the mouse and immune cell images were created with BioRender.com.

973 The figure data were organized by Photoshop CS6 (Adobe).

974

#### 975 **ACKNOWLEDGMENTS**

976 This research was supported by NIAID/NIH supplement grant 3R01AI095366-07S1

977 (subaward: 1100992-100) and in part by NIAID/NIH grants AI111538 and AI081726 and

978 National Science Foundation grant MCB-0923873 to V.B.R. Special funding provided by

979 the IHII-COVID19 pilot grant as well as the support through the John S. Dunn Endowed

980 Chair to A.K.C. is greatly acknowledged.

981

#### 982 **AUTHOR CONTRIBUTIONS**

983 V.B.R. and A.K. C. designed and directed the project. J.Z. and V.B.R. designed vaccine

984 constructs. S.J. designed Beta variant trimer and purification protocol. H.B. and S.J.

985 purified WT and Secto- $\beta$  trimers. N.A. produced vaccine phages. J.Z. prepared vaccine

986 samples and performed all ELISAs and binding assays. P.B.K, V.T., E.K.H. performed animal

987 studies; J.P.O. performed histopathology studies; A.K., C.L.G., and S.B. performed

988 microbiota studies; A.D. and V.T. performed neutralization and viral load studies. J.Z., J.S.,

989 P.K.B., J.P.O., Y.M.H, A.K., C.L.G., S.B., A.D., V.T., C-Te. K.T., A.K.C., and V.B.R. analyzed and

990 interpreted the data. V.B.R., A.K.C., and J.Z. wrote the manuscript.

991

#### 992 **DECLARATION OF INTERESTS**

993 The authors declare no competing interests.



994 **SUPPLEMENTAL INFORMATION**

995

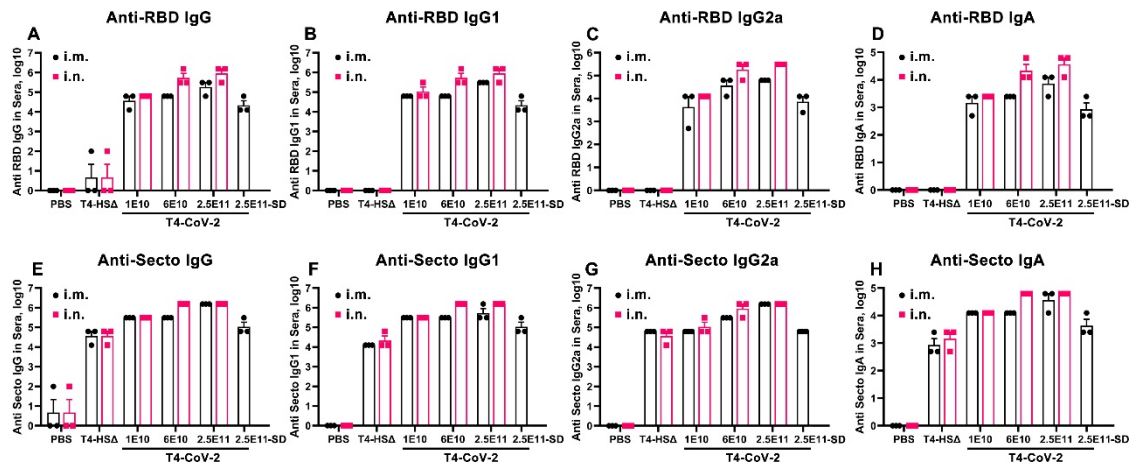

996

997 **Figure S1. Anti-spike/RBD systemic humoral responses in sera from i.m. or i.n.**  
998 **administered BALB/c mice using various doses of T4-CoV-2 vaccine.** ELISA assays were  
999 performed to measure reciprocal endpoint antibody titers of sera from i.m. (black) or i.n.  
1000 (red) vaccinations: anti-RBD IgG (A), anti-RBD IgG1 (B), anti-RBD IgG2a (C), anti-RBD IgA  
1001 (D), anti-Secto IgG (E), anti-Secto IgG1 (F), anti-Secto IgG2a (G), and anti-Secto IgA (H).  
1002 PBS and T4-HSA were used as naïve and vector controls, respectively. SD, single-dose.  
1003 Data represent mean  $\pm$  SEM. Data are from 3 pooled independent experiments ( $n = 22$   
1004 for T4-CoV-2,  $n = 10$  for T4-HSA, and  $n = 5$  for PBS).

1005

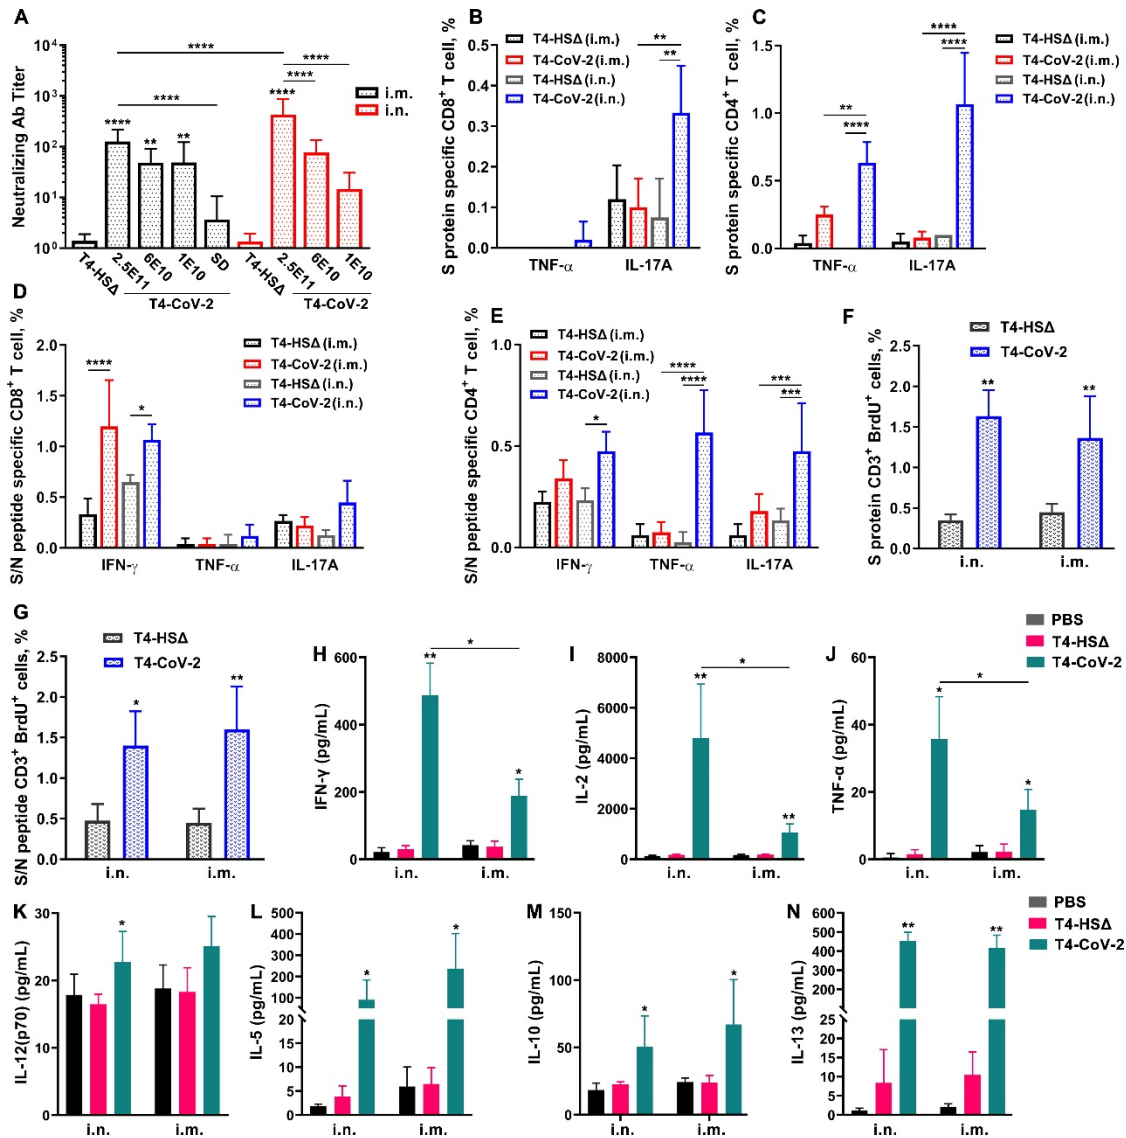

1006

1007 **Figure S2. Neutralizing antibody and cellular immune responses in i.m. and i.n.**  
 1008 **vaccinated BALB/c mice.**

1009 **(A)** Virus neutralizing activity in sera of i.m. and i.n. vaccinated mice was determined by  
 1010 Vero E6 cell cytopathic assay using ancestral SARS-CoV-2 US-WA-1/2020 strain.

1011 **(B and C)** Cellular immune responses after stimulation with purified Secto trimers. Cells  
 1012 were stained with T cell surface markers CD3, CD4, and CD8 followed by intracellular  
 1013 TNF $\alpha$  and IL-17A staining. Percentage of TNF $\alpha$ <sup>+</sup> CD8<sup>+</sup> (B), IL-17A<sup>+</sup> CD8<sup>+</sup> (B), TNF $\alpha$ <sup>+</sup> CD4<sup>+</sup> (C),  
 1014 IL-17A<sup>+</sup> CD4<sup>+</sup> (C) cells were plotted.

1015 **(D and E)** Cellular immune responses after stimulation with S- and NP- peptides.  
 1016 Percentage of IFN $\gamma$ <sup>+</sup> or TNF $\alpha$ <sup>+</sup> or IL-17A<sup>+</sup> in CD8<sup>+</sup> (D) or CD4<sup>+</sup> (E) cells were plotted.

1017 **(F and G)** T cell proliferation in mice immunized with T4-CoV-2 vaccine. Spleens were  
 1018 harvested from mice 21 days after the boost. Splenocytes were isolated and stimulated  
 1019 with either purified S protein trimer (F) or S- and NP- peptides (G). Cells were stained for  
 1020 T cell surface marker CD3 as well as for incorporated BrdU, and analyzed by flow

1021 cytometry. The percent of BrdU incorporation in CD3 positive cells was plotted.  
 1022 **(H to N)** Splenocyte cytokine response to S and NP peptide stimulation. The cytokines in  
 1023 the cell culture supernatants were analyzed by using Bioplex-23 assay. The representative  
 1024 Th1 (H to K) and Th2 (L to N) cytokines are shown.  
 1025 For A to G, data represent mean  $\pm$  standard deviation and are representative of five  
 1026 biological replicates. A Two-way ANOVA with Tukey post hoc test was used; \*P < 0.05;  
 1027 \*\*P < 0.01, \*\*\*P < 0.001, \*\*\*\*P < 0.0001.  
 1028 For H to N, statistical significance was determined using nonparametric Student's t test  
 1029 compared to T4-HS $\Delta$  vector vs T4-CoV-2 groups, and i.n. vs i.m. administration groups;  
 1030 \*P < 0.05; \*\*P < 0.01. Data represent mean  $\pm$  standard deviation and are representative  
 1031 of five biological replicates.  
 1032

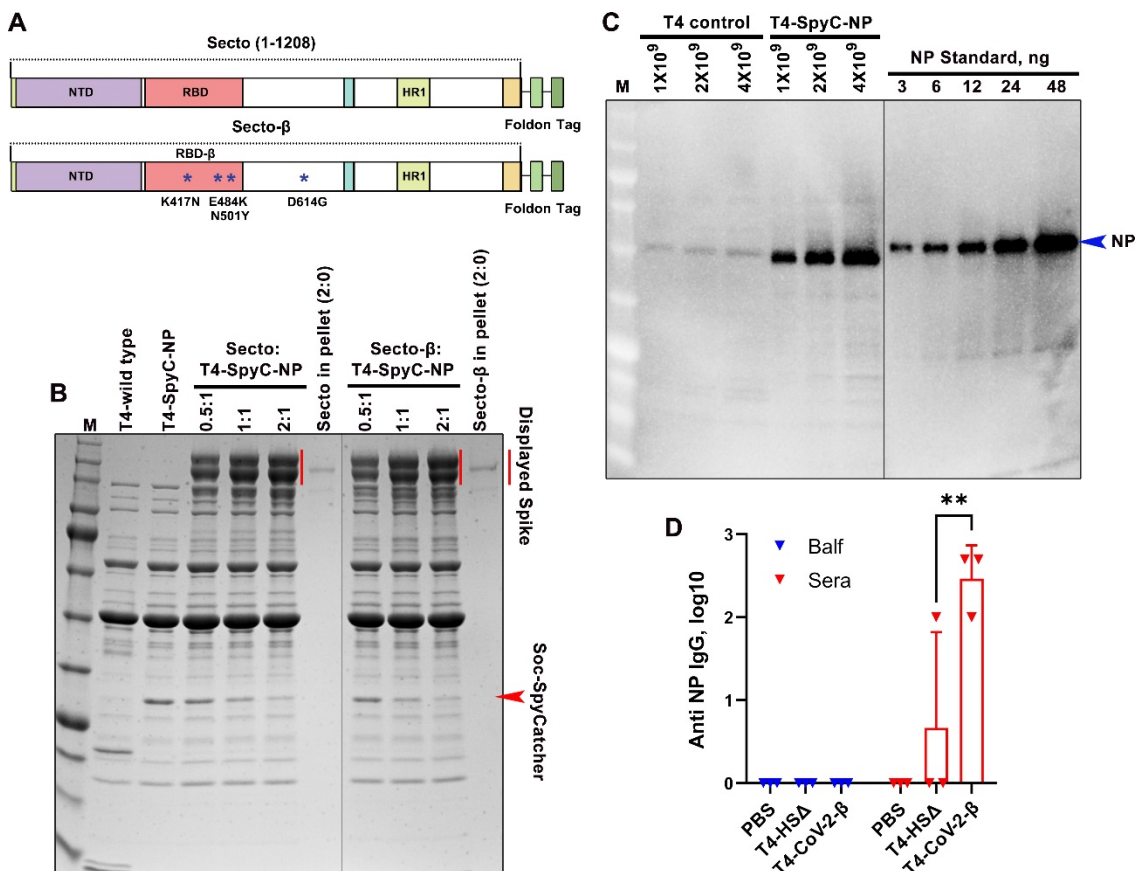

1033  
 1034 **Figure S3. Characterization of Secto- $\beta$  trimer, copy number of NP in T4-CoV-2- $\beta$  vaccine,**  
 1035 **and anti-NP antibody responses.**

1036 **(A)** Schematics of Secto and Secto- $\beta$  cassette for expression in ExpiCHO cells. The Secto-  
 1037  $\beta$  was constructed by incorporating K417N, E484K, and N501Y mutations in the receptor-  
 1038 binding domain (RBD) and D614G mutation in the S2 region of the trimer. These  
 1039 mutations are the core mutations of Beta variant which are responsible for the immune  
 1040 escape in vaccinated people.

1041 **(B)** *In vitro* display of Secto and Secto- $\beta$  trimers on T4-SpyCatcher phage at increasing  
 1042 ratios of S protein molecules to Soc binding sites (0:1 to 2:1). S trimer and T4-SpyCatcher

1043 phage were incubated at 4°C for 1 h, followed by centrifugation to remove the unbound  
 1044 material. After two washes, the pellet was resuspended in buffer (which one!), and SDS-  
 1045 PAGE was performed. The positions of Soc-SpyCatcher (red arrowhead) and S protein  
 1046 bands (red line) are indicated.

1047 **(C)** Quantification of the copy number of NP protein molecules packaged in T4-CoV-2  
 1048 vaccine by Western-blotting using commercial NP standard (Sino Biological).

1049 **(D)** Anti-NP antibody responses in sera (red) and BALF (blue) of immunized mice at day  
 1050 21 after boosting. ELISA assays were performed to determine reciprocal endpoint  
 1051 antibody titers of anti-NP IgG. PBS and T4-HSΔ were used as naïve and vector controls,  
 1052 respectively. Data represent mean ± SEM. Data are from 3 pooled independent  
 1053 experiments (n = 15 for sera analysis and n = 5 for BALF analysis). P values were calculated  
 1054 using a Two-way ANOVA with Tukey post hoc test to compare multiple groups. \*\*P<0.01.  
 1055

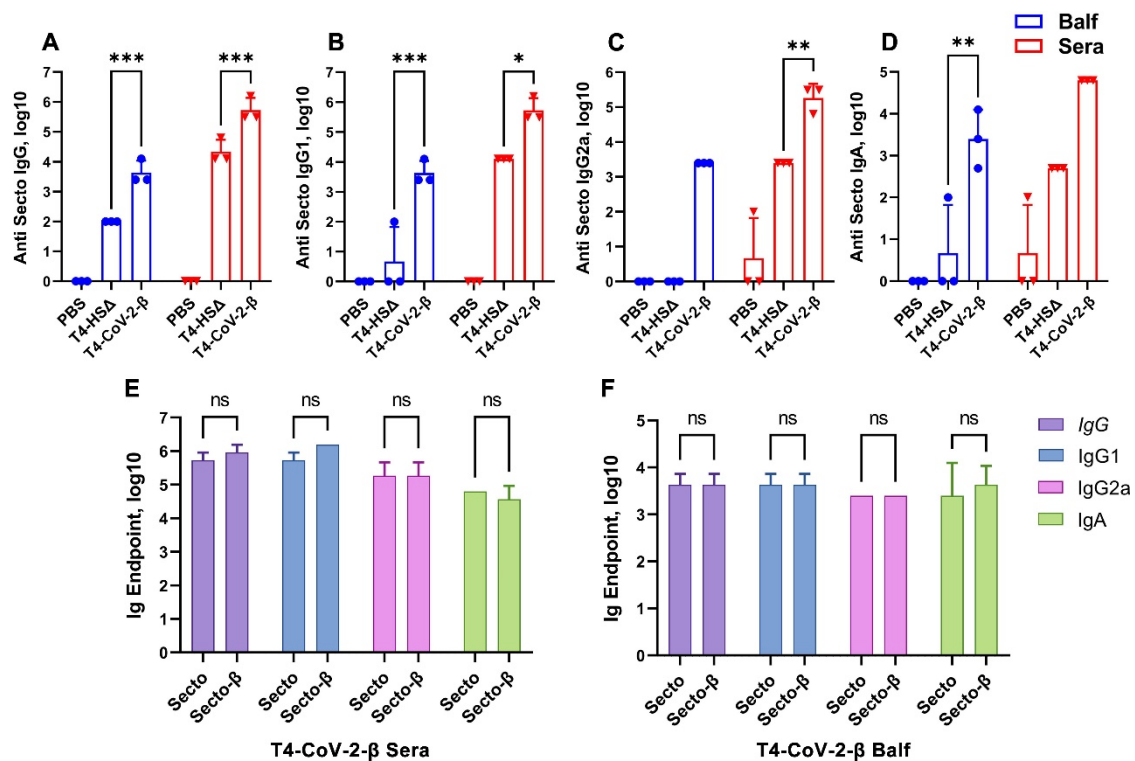

1056

1057 **Figure S4. Secto- and Secto-β-trimer binding antibody titers in T4-CoV-2-β i.n.**  
 1058 **immunized hACE2 transgenic mice.**

1059 **(A to D)** Antibody responses in sera (red) and BALF (blue) of immunized mice at day 21  
 1060 after boosting. ELISA assays were performed to determine reciprocal endpoint antibody  
 1061 titers of anti-Secto IgG (A), anti-Secto IgG1 (B), anti-Secto IgG2a (C), and anti-Secto IgA  
 1062 (D). Data are from 3 pooled independent experiments (n = 15 for sera analysis and n = 5  
 1063 for BALF analysis). P values were calculated using a Two-way ANOVA with Tukey post hoc  
 1064 test to compare multiple groups. \*P<0.05, \*\*P<0.01, \*\*\*P<0.001.

1065 **(E and F)** Comparison between anti-Secto and anti-Secto-β antibody responses (IgG, IgG1,  
 1066 IgG2a, and IgA) in sera (E) and BALF (F). ns, no significance.

1067

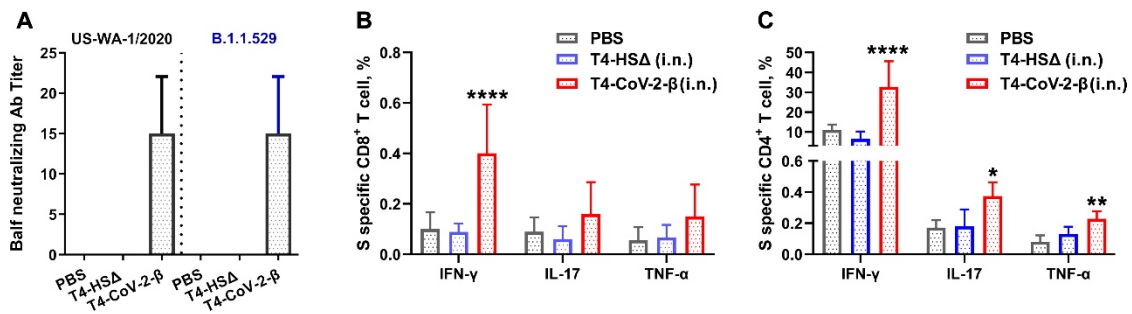

1068

1069 **Figure S5. Virus neutralization activity in BALF and T cell immune responses in hACE2**  
 1070 **transgenic mice.**

1071 **(A)** Neutralizing antibody titers in BALF were determined by Vero E6 cell cytopathic assay  
 1072 using ancestral SARS-CoV-2 US-WA-1/2020 and B.1.1.529 (Omicron) strains. Data  
 1073 represent mean  $\pm$  standard deviation. Data are from 2 pooled replicate experiments.

1074 **(B and C)** Analysis of CD8<sup>+</sup> (B) and CD4<sup>+</sup> (C) T cell immune response in stimulation with  
 1075 Secto-β protein. Cells were then stained with T cell surface markers CD3, CD4, and CD8  
 1076 followed by intracellular IFN $\gamma$ , TNF $\alpha$  and IL-17A staining. Percentage of IFN $\gamma$ <sup>+</sup> or TNF $\alpha$ <sup>+</sup> or  
 1077 IL-17A<sup>+</sup> in CD4<sup>+</sup> or CD8<sup>+</sup> cells were plotted. P values were calculated using a Two-way  
 1078 ANOVA with Tukey post hoc test to compare multiple groups; \*P < 0.05; \*\*P < 0.01,  
 1079 \*\*\*\*P < 0.0001. Data represent mean  $\pm$  standard deviation. Data are representative of five  
 1080 biological replicates.

1081

## 1082 REFERENCES

- 1083 Afkhami, S., D'Agostino, M.R., Zhang, A., Stacey, H.D., Marzok, A., Kang, A., Singh, R., Bavananthasivam, J., Ye, G.,  
 1084 Luo, X., *et al.* (2022). Respiratory mucosal delivery of next-generation COVID-19 vaccine provides robust  
 1085 protection against both ancestral and variant strains of SARS-CoV-2. *Cell*.
- 1086 Ahmad, L. (2021). Implication of SARS-CoV-2 Immune Escape Spike Variants on Secondary and Vaccine  
 1087 Breakthrough Infections. *Frontiers in immunology* 12.
- 1088 Alu, A., Chen, L., Lei, H., Wei, Y., Tian, X., and Wei, X. (2022). Intranasal COVID-19 vaccines: From bench to bed.  
 1089 *EBioMedicine* 76.
- 1090 An, D., Li, K., Rowe, D.K., Diaz, M.C.H., Griffin, E.F., Beavis, A.C., Johnson, S.K., Padykula, I., Jones, C.A., Briggs, K.,  
 1091 *et al.* (2021). Protection of K18-hACE2 mice and ferrets against SARS-CoV-2 challenge by a single-dose mucosal  
 1092 immunization with a parainfluenza virus 5-based COVID-19 vaccine. *Science advances* 7.
- 1093 Anipindi, V.C., Bagri, P., Dizzell, S.E., Jiménez-Saiz, R., Jordana, M., Snider, D.P., Stämpfli, M.R., and Kaushic, C.  
 1094 (2019). IL-17 Production by  $\gamma\delta$  T Cells Is Critical for Inducing  
 1095 T<sub>H</sub>17 Responses in the Female Genital Tract and Regulated by Estradiol and Microbiota.  
 1096 *ImmunoHorizons* 3, 317.
- 1097 Asahi-Ozaki, Y., Yoshikawa, T., Iwakura, Y., Suzuki, Y., Tamura, S.-i., Kurata, T., and Sata, T. (2004). Secretory IgA  
 1098 antibodies provide cross-protection against infection with different strains of influenza B virus. *Journal of medical*  
 1099 *virology* 74, 328-335.

- 1100 Barr Jeremy, J., Auro, R., Sam-Soon, N., Kassegne, S., Peters, G., Bonilla, N., Hatay, M., Mourtada, S., Bailey, B.,  
1101 Youle, M., *et al.* (2015). Subdiffusive motion of bacteriophage in mucosal surfaces increases the frequency of  
1102 bacterial encounters. *Proceedings of the National Academy of Sciences* *112*, 13675-13680.
- 1103 Barr, J.J., Auro, R., Furlan, M., Whiteson, K.L., Erb, M.L., Pogliano, J., Stotland, A., Wolkowicz, R., Cutting, A.S.,  
1104 Doran, K.S., *et al.* (2013). Bacteriophage adhering to mucus provide a non-host-derived immunity. *Proceedings*  
1105 *of the National Academy of Sciences of the United States of America* *110*, 10771-10776.
- 1106 Borges, O., Lebre, F., Bento, D., Borchard, G., and Junginger, H.E. (2010). Mucosal vaccines: recent progress in  
1107 understanding the natural barriers. *Pharmaceutical research* *27*, 211-223.
- 1108 Bricker, T.L., Darling, T.L., Hassan, A.O., Harastani, H.H., Soung, A., Jiang, X., Dai, Y.-N., Zhao, H., Adams, L.J.,  
1109 Holtzman, M.J., *et al.* (2021). A single intranasal or intramuscular immunization with chimpanzee adenovirus-  
1110 vectored SARS-CoV-2 vaccine protects against pneumonia in hamsters. *Cell reports* *36*, 109400.
- 1111 Bruttin, A., and Brussow, H. (2005). Human volunteers receiving Escherichia coli phage T4 orally: a safety test of  
1112 phage therapy. *Antimicrobial agents and chemotherapy* *49*, 2874-2878.
- 1113 Caporaso, J.G., Kuczynski, J., Stombaugh, J., Bittinger, K., Bushman, F.D., Costello, E.K., Fierer, N., Peña, A.G.,  
1114 Goodrich, J.K., Gordon, J.I., *et al.* (2010). QIIME allows analysis of high-throughput community sequencing data.  
1115 *Nat Methods* *7*, 335-336.
- 1116 Castro, F., Cardoso, A.P., Gonçalves, R.M., Serre, K., and Oliveira, M.J. (2018). Interferon-Gamma at the Crossroads  
1117 of Tumor Immune Surveillance or Evasion. *Frontiers in immunology* *9*.
- 1118 Chavda, V.P., Vora, L.K., Pandya, A.K., and Patravale, V.B. (2021). Intranasal vaccines for SARS-CoV-2: From  
1119 challenges to potential in COVID-19 management. *Drug Discovery Today* *26*, 2619-2636.
- 1120 Chen, J., Vitetta, L., Henson, J.D., and Hall, S. (2021). The intestinal microbiota and improving the efficacy of  
1121 COVID-19 vaccinations. *J Funct Foods* *87*, 104850-104850.
- 1122 Corbett, K.S., Edwards, D.K., Leist, S.R., Abiona, O.M., Boyoglu-Barnum, S., Gillespie, R.A., Himansu, S., Schafer,  
1123 A., Ziwawo, C.T., DiPiazza, A.T., *et al.* (2020). SARS-CoV-2 mRNA vaccine design enabled by prototype pathogen  
1124 preparedness. *Nature* *586*, 567-571.
- 1125 Counoupas, C., Ferrell, K.C., Ashhurst, A., Bhattacharyya, N.D., Nagalingam, G., Stewart, E.L., Feng, C.G., Petrovsky,  
1126 N., Britton, W.J., and Triccas, J.A. (2020). Mucosal delivery of a multistage subunit vaccine promotes development  
1127 of lung-resident memory T cells and affords interleukin-17-dependent protection against pulmonary tuberculosis.  
1128 *npj Vaccines* *5*, 105.
- 1129 de Vries, C.R., Chen, Q., Demirdjian, S., Kaber, G., Khosravi, A., Liu, D., Van Belleghem, J.D., and Bollyky, P.L. (2021).  
1130 Phages in vaccine design and immunity; mechanisms and mysteries. *Current opinion in biotechnology* *68*, 160-  
1131 165.
- 1132 Dicks, M.D.J., Rose, L.M., Bowman, L.A.H., Graham, C., Doores, K.J., Malim, M.H., Draper, S.J., Howarth, M., and  
1133 Biswas, S. (2022). Modular capsid decoration boosts adenovirus vaccine-induced humoral  
1134 and cellular immunity against SARS-CoV-2. *bioRxiv*.
- 1135 Edara, V.-V., Manning, K.E., Ellis, M., Lai, L., Moore, K.M., Foster, S.L., Floyd, K., Davis-Gardner, M.E., Mantus, G.,  
1136 Nyhoff, L.E., *et al.* (2022). mRNA-1273 and BNT162b2 mRNA vaccines have reduced neutralizing activity against  
1137 the SARS-CoV-2 omicron variant. *Cell Reports Medicine* *3*.
- 1138 Edgar, R.C. (2013). UPARSE: highly accurate OTU sequences from microbial amplicon reads. *Nat Methods* *10*, 996-  
1139 998.
- 1140 Endl, E., Steinbach, P., Knüchel, R., and Hofstädter, F. (1997). Analysis of cell cycle-related Ki-67 and p120  
1141 expression by flow cytometric BrdUrd-Hoechst/7AAD and immunolabeling technique. *Cytometry* *29*, 233-241.

- 1142 Excler, J.-L., Saville, M., Berkley, S., and Kim, J.H. (2021). Vaccine development for emerging infectious diseases.  
1143 *Nature medicine* 27, 591-600.
- 1144 Focosi, D., Maggi, F., and Casadevall, A. (2022). Mucosal Vaccines, Sterilizing Immunity, and the Future of SARS-  
1145 CoV-2 Virulence. *Viruses* 14.
- 1146 Freeman, K.G., Wetzel, K.S., Zhang, Y., Zack, K.M., Jacobs-Sera, D., Walters, S.M., Barbeau, D.J., McElroy, A.K.,  
1147 Williams, J.V., and Hatfull, G.F. (2021). A Mycobacteriophage-Based Vaccine Platform: SARS-CoV-2 Antigen  
1148 Expression and Display. *Microorganisms* 9, 2414.
- 1149 Guo, X., Barroso, L., Lysterly, D.M., Petri, W.A., and Houpt, E.R. (2011). CD4+ and CD8+ T cell- and IL-17-mediated  
1150 protection against *Entamoeba histolytica* induced by a recombinant vaccine. *Vaccine* 29, 772-777.
- 1151 Harcourt, J., Tamin, A., Lu, X., Kamili, S., Sakthivel, S.K., Murray, J., Queen, K., Tao, Y., Paden, C.R., Zhang, J., *et al.*  
1152 (2020). Isolation and characterization of SARS-CoV-2 from the first US COVID-19 patient. *bioRxiv : the preprint*  
1153 *server for biology*, 2020.2003.2002.972935.
- 1154 Hassan, A.O., Kafai, N.M., Dmitriev, I.P., Fox, J.M., Smith, B.K., Harvey, I.B., Chen, R.E., Winkler, E.S., Wessel, A.W.,  
1155 Case, J.B., *et al.* (2020). A Single-Dose Intranasal ChAd Vaccine Protects Upper and Lower Respiratory Tracts  
1156 against SARS-CoV-2. *Cell* 183, 169-184 e113.
- 1157 Hassan, A.O., Shrihari, S., Gorman, M.J., Ying, B., Yaun, D., Raju, S., Chen, R.E., Dmitriev, I.P., Kashentseva, E.,  
1158 Adams, L.J., *et al.* (2021). An intranasal vaccine durably protects against SARS-CoV-2 variants in mice. *Cell reports*,  
1159 109452.
- 1160 Hildebrand, F., Tadeo, R., Voigt, A.Y., Bork, P., and Raes, J. (2014). LotuS: an efficient and user-friendly OTU  
1161 processing pipeline. *Microbiome* 2, 30.
- 1162 Hou, Y.J., Okuda, K., Edwards, C.E., Martinez, D.R., Asakura, T., Dinnon, K.H., Kato, T., Lee, R.E., Yount, B.L.,  
1163 Mascenik, T.M., *et al.* (2020). SARS-CoV-2 Reverse Genetics Reveals a Variable Infection Gradient in the  
1164 Respiratory Tract. *Cell* 182, 429-446.e414.
- 1165 Jończyk, E., Kłak, M., Międzybrodzki, R., and Górski, A. (2011). The influence of external factors on  
1166 bacteriophages--review. *Folia microbiologica* 56, 191-200.
- 1167 Joyce, M.G., Chen, W.-H., Sankhala, R.S., Hajduczki, A., Thomas, P.V., Choe, M., Martinez, E.J., Chang, W.C.,  
1168 Peterson, C.E., Morrison, E.B., *et al.* (2021). SARS-CoV-2 ferritin nanoparticle vaccines elicit broad SARS  
1169 coronavirus immunogenicity. *Cell reports* 37, 110143.
- 1170 Keeble, A.H., Turkki, P., Stokes, S., Khairil Anuar, I.N.A., Rahikainen, R., Hytonen, V.P., and Howarth, M. (2019).  
1171 Approaching infinite affinity through engineering of peptide-protein interaction. *Proceedings of the National*  
1172 *Academy of Sciences of the United States of America*.
- 1173 Kilgore, P.B., Sha, J., Andersson, J.A., Motin, V.L., and Chopra, A.K. (2021a). A new generation needle- and  
1174 adjuvant-free trivalent plague vaccine utilizing adenovirus-5 nanoparticle platform. *NPI vaccines* 6, 21.
- 1175 Kilgore, P.B., Sha, J., Hendrix, E.K., Motin, V.L., and Chopra, A.K. (2021b). Combinatorial Viral Vector-Based and  
1176 Live Attenuated Vaccines without an Adjuvant to Generate Broader Immune Responses to Effectively Combat  
1177 Pneumonic Plague. *mBio* 12, e0322321.
- 1178 Kim, J.H., Marks, F., and Clemens, J.D. (2021). Looking beyond COVID-19 vaccine phase 3 trials. *Nature medicine*  
1179 27, 205-211.
- 1180 King, R.G., Silva-Sanchez, A., Peel, J.N., Botta, D., Meza-Perez, S., Allie, R., Schultz, M.D., Liu, M., Bradley, J.E., Qiu,  
1181 S., *et al.* (2020). Single-dose intranasal administration of AdCOVID elicits systemic and mucosal immunity against  
1182 SARS-CoV-2 in mice. *bioRxiv*.
- 1183 Krammer, F. (2020). SARS-CoV-2 vaccines in development. *Nature* 586, 516-527.

- 1184 Kroidl, I., Mecklenburg, I., Schneiderat, P., Müller, K., Girl, P., Wölfel, R., Sing, A., Dangel, A., Wieser, A., and  
1185 Hoelscher, M. (2021). Vaccine breakthrough infection and onward transmission of SARS-CoV-2 Beta (B.1.351)  
1186 variant, Bavaria, Germany, February to March 2021. *Eurosurveillance* 26.
- 1187 Ku, M.W., Bourguine, M., Authie, P., Lopez, J., Nemirov, K., Moncoq, F., Noirat, A., Vesin, B., Nevo, F., Blanc, C., *et*  
1188 *al.* (2021). Intranasal vaccination with a lentiviral vector protects against SARS-CoV-2 in preclinical animal models.  
1189 *Cell host & microbe* 29, 236-249 e236.
- 1190 Lapuente, D., Fuchs, J., Willar, J., Vieira Antão, A., Eberlein, V., Uhlig, N., Issmail, L., Schmidt, A., Oltmanns, F.,  
1191 Peter, A.S., *et al.* (2021). Protective mucosal immunity against SARS-CoV-2 after heterologous systemic prime-  
1192 mucosal boost immunization. *Nature communications* 12, 6871.
- 1193 Lavelle, E.C., and Ward, R.W. (2021). Mucosal vaccines - fortifying the frontiers. *Nature reviews Immunology*.
- 1194 Leist, S.R., Dinnon, K.H., 3rd, Schafer, A., Tse, L.V., Okuda, K., Hou, Y.J., West, A., Edwards, C.E., Sanders, W., Fritch,  
1195 E.J., *et al.* (2020). A Mouse-Adapted SARS-CoV-2 Induces Acute Lung Injury and Mortality in Standard Laboratory  
1196 Mice. *Cell* 183, 1070-1085 e1012.
- 1197 Li, M., Guo, P., Chen, C., Feng, H., Zhang, W., Gu, C., Wen, G., Rao, V.B., and Tao, P. (2021). Bacteriophage T4  
1198 Vaccine Platform for Next-Generation Influenza Vaccine Development. *Frontiers in immunology* 12.
- 1199 Liu, X., Luongo, C., Matsuoka, Y., Park, H.-S., Santos, C., Yang, L., Moore Ian, N., Afroz, S., Johnson Reed, F., Lafont  
1200 Bernard, A.P., *et al.* (2021). A single intranasal dose of a live-attenuated parainfluenza virus-vectored SARS-CoV-  
1201 2 vaccine is protective in hamsters. *Proceedings of the National Academy of Sciences* 118, e2109744118.
- 1202 Liu, Y., Dai, L., Dong, J., Chen, C., Zhu, J., Rao, V.B., and Tao, P. (2020). Covalent modifications of bacteriophage  
1203 genome confer a degree of resistance to bacterial CRISPR systems. *Journal of virology*.
- 1204 Liu, Y., and Rocklöv, J. (2021). The reproductive number of the Delta variant of SARS-CoV-2 is far higher compared  
1205 to the ancestral SARS-CoV-2 virus. *Journal of Travel Medicine* 28, taab124.
- 1206 Ma, W.-T., Yao, X.-T., Peng, Q., and Chen, D.-K. The protective and pathogenic roles of IL-17 in viral infections:  
1207 friend or foe? *Open biology* 9, 190109.
- 1208 Macpherson, A.J., McCoy, K.D., Johansen, F.E., and Brandtzaeg, P. (2008). The immune geography of IgA induction  
1209 and function. *Mucosal immunology* 1, 11-22.
- 1210 Markov, P.V., Katzourakis, A., and Stilianakis, N.I. (2022). Antigenic evolution will lead to new SARS-CoV-2 variants  
1211 with unpredictable severity. *Nature Reviews Microbiology* 20, 251-252.
- 1212 Mercado, N.B., Zahn, R., Wegmann, F., Loos, C., Chandrashekar, A., Yu, J., Liu, J., Peter, L., McMahan, K., Tostanoski,  
1213 L.H., *et al.* (2020). Single-shot Ad26 vaccine protects against SARS-CoV-2 in rhesus macaques. *Nature* 586, 583-  
1214 588.
- 1215 Mistry, P., Barmania, F., Mellet, J., Peta, K., Strydom, A., Viljoen, I.M., James, W., Gordon, S., and Pepper, M.S.  
1216 (2022). SARS-CoV-2 Variants, Vaccines, and Host Immunity. *Frontiers in immunology* 12.
- 1217 Mlcochova, P., Kemp, S.A., Dhar, M.S., Papa, G., Meng, B., Ferreira, I.A.T.M., Datir, R., Collier, D.A., Albecka, A.,  
1218 Singh, S., *et al.* (2021). SARS-CoV-2 B.1.617.2 Delta variant replication and immune evasion. *Nature* 599, 114-119.
- 1219 Nguyen, S., Baker, K., Padman Benjamin, S., Patwa, R., Dunstan Rhys, A., Weston Thomas, A., Schlosser, K., Bailey,  
1220 B., Lithgow, T., Lazarou, M., *et al.* (2017). Bacteriophage Transcytosis Provides a Mechanism To Cross Epithelial  
1221 Cell Layers. *mBio* 8, e01874-01817.
- 1222 Park, J.-G., Oladunni, F.S., Rohaim, M.A., Whittingham-Dowd, J., Tollitt, J., Hodges, M.D.J., Fathallah, N., Assas,  
1223 M.B., Alhazmi, W., Almilaibary, A., *et al.* (2021). Immunogenicity and protective efficacy of an intranasal live-  
1224 attenuated vaccine against SARS-CoV-2. *iScience* 24, 102941.



- 1225 Penit, C. (1986). In vivo thymocyte maturation. BUdR labeling of cycling thymocytes and phenotypic analysis of  
1226 their progeny support the single lineage model. *J Immunol* *137*, 2115-2121.
- 1227 Popescu, M., Van Belleghem, J.D., Khosravi, A., and Bollyky, P.L. (2021). Bacteriophages and the Immune System.  
1228 *Annual Review of Virology* *8*, 415-435.
- 1229 Quast, C., Pruesse, E., Yilmaz, P., Gerken, J., Schweer, T., Yarza, P., Peplies, J., and Glöckner, F.O. (2013). The SILVA  
1230 ribosomal RNA gene database project: improved data processing and web-based tools. *Nucleic Acids Res* *41*,  
1231 D590-596.
- 1232 Rao, M., Peachman, K.K., Li, Q., Matyas, G.R., Shivachandra, S.B., Borschel, R., Morthole, V.I., Fernandez-Prada,  
1233 C., Alving, C.R., and Rao, V.B. (2011a). Highly effective generic adjuvant systems for orphan or poverty-related  
1234 vaccines. *Vaccine* *29*, 873-877.
- 1235 Rao, M., Peachman, K.K., Li, Q., Matyas, G.R., Shivachandra, S.B., Borschel, R., Morthole, V.I., Fernandez-Prada,  
1236 C., Alving, C.R., and Rao, V.B. (2011b). Highly effective generic adjuvant systems for orphan or poverty-related  
1237 vaccines. *Vaccine* *29*, 873-877.
- 1238 Renegar, K.B., Small, P.A., Boykins, L.G., and Wright, P.F. (2004). Role of IgA versus IgG in the Control of Influenza  
1239 Viral Infection in the Murine Respiratory Tract. *The Journal of Immunology* *173*, 1978.
- 1240 Ruck, C.E., Odumade, O.A., and Smolen, K.K. (2020). Vaccine Interactions With the Infant Microbiome: Do They  
1241 Define Health and Disease? *Front Pediatr* *8*, 565368-565368.
- 1242 Sadarangani, M., Marchant, A., and Kollmann, T.R. (2021). Immunological mechanisms of vaccine-induced  
1243 protection against COVID-19 in humans. *Nature Reviews Immunology* *21*, 475-484.
- 1244 Salonen, A., Nikkilä, J., Jalanka-Tuovinen, J., Immonen, O., Rajilić-Stojanović, M., Kekkonen, R.A., Palva, A., and de  
1245 Vos, W.M. (2010). Comparative analysis of fecal DNA extraction methods with phylogenetic microarray: effective  
1246 recovery of bacterial and archaeal DNA using mechanical cell lysis. *J Microbiol Methods* *81*, 127-134.
- 1247 Sette, A., and Crotty, S. (2021). Adaptive immunity to SARS-CoV-2 and COVID-19. *Cell*.
- 1248 Sterlin, D., Mathian, A., Miyara, M., Mohr, A., Anna, F., Claër, L., Quentric, P., Fadlallah, J., Devilliers, H., Ghillani,  
1249 P., *et al.* (2021a). IgA dominates the early neutralizing antibody response to SARS-CoV-2. *Science translational*  
1250 *medicine* *13*, eabd2223.
- 1251 Sterlin, D., Mathian, A., Miyara, M., Mohr, A., Anna, F., Claer, L., Quentric, P., Fadlallah, J., Devilliers, H., Ghillani,  
1252 P., *et al.* (2021b). IgA dominates the early neutralizing antibody response to SARS-CoV-2. *Science translational*  
1253 *medicine* *13*.
- 1254 Su, F., Patel, G.B., Hu, S., and Chen, W. (2016). Induction of mucosal immunity through systemic immunization:  
1255 Phantom or reality? *Human vaccines & immunotherapeutics* *12*, 1070-1079.
- 1256 Sun, W., Liu, Y., Amanat, F., González-Domínguez, I., McCroskery, S., Slamanig, S., Coughlan, L., Rosado, V., Lemus,  
1257 N., Jangra, S., *et al.* (2021). A Newcastle disease virus expressing a stabilized spike protein of SARS-CoV-2 induces  
1258 protective immune responses. *Nature communications* *12*.
- 1259 Tao, P., Mahalingam, M., Kirtley, M.L., van Lier, C.J., Sha, J., Yeager, L.A., Chopra, A.K., and Rao, V.B. (2013).  
1260 Mutated and bacteriophage T4 nanoparticle arrayed F1-V immunogens from *Yersinia pestis* as next generation  
1261 plague vaccines. *PLoS pathogens* *9*, e1003495.
- 1262 Tao, P., Mahalingam, M., Zhu, J., Moayeri, M., Sha, J., Lawrence, W.S., Leppla, S.H., Chopra, A.K., and Rao, V.B.  
1263 (2018a). A Bacteriophage T4 Nanoparticle-Based Dual Vaccine against Anthrax and Plague. *mBio* *9*.
- 1264 Tao, P., Wu, X., Tang, W.C., Zhu, J., and Rao, V. (2017). Engineering of Bacteriophage T4 Genome Using CRISPR-  
1265 Cas9. *ACS synthetic biology* *6*, 1952-1961.

- 1266 Tao, P., Zhu, J., Mahalingam, M., Batra, H., and Rao, V.B. (2018b). Bacteriophage T4 nanoparticles for vaccine  
1267 delivery against infectious diseases. *Advanced drug delivery reviews*.
- 1268 Tegally, H., Wilkinson, E., Giovanetti, M., Iranzadeh, A., Fonseca, V., Giandhari, J., Doolabh, D., Pillay, S., San, E.J.,  
1269 Msomi, N., *et al.* (2021). Detection of a SARS-CoV-2 variant of concern in South Africa. *Nature* 592, 438-443.
- 1270 Tesmer, L.A., Lundy, S.K., Sarkar, S., and Fox, D.A. (2008). Th17 cells in human disease. *Immunol Rev* 223, 87-113.
- 1271 Tiboni, M., Casettari, L., and Illum, L. (2021). Nasal vaccination against SARS-CoV-2: Synergistic or alternative to  
1272 intramuscular vaccines? *International journal of pharmaceutics* 603, 120686.
- 1273 Tiner, B.L., Sha, J., Cong, Y., Kirtley, M.L., Andersson, J.A., and Chopra, A.K. (2016). Immunisation of two rodent  
1274 species with new live-attenuated mutants of. *NPJ Vaccines* 1, 16020.
- 1275 Tregoning, J.S., Flight, K.E., Higham, S.L., Wang, Z., and Pierce, B.F. (2021). Progress of the COVID-19 vaccine effort:  
1276 viruses, vaccines and variants versus efficacy, effectiveness and escape. *Nature Reviews Immunology* 21, 626-636.
- 1277 van Doremalen, N., Purushotham, J., Schulz, J., Holbrook, M., Bushmaker, T., Carmody, A., Port, J., Yinda, K.C.,  
1278 Okumura, A., Saturday, G., *et al.* (2021a). Intranasal ChAdOx1 nCoV-19/AZD1222 vaccination reduces shedding of  
1279 SARS-CoV-2 D614G in rhesus macaques. *bioRxiv*.
- 1280 van Doremalen, N., Purushotham Jyothi, N., Schulz Jonathan, E., Holbrook Myndi, G., Bushmaker, T., Carmody, A.,  
1281 Port Julia, R., Yinda Claude, K., Okumura, A., Saturday, G., *et al.* (2021b). Intranasal ChAdOx1 nCoV-19/AZD1222  
1282 vaccination reduces viral shedding after SARS-CoV-2 D614G challenge in preclinical models. *Science translational  
1283 medicine* 13, eabh0755.
- 1284 Van Hoecke, L., Job, E.R., Saelens, X., and Roose, K. (2017). Bronchoalveolar Lavage of Murine Lungs to Analyze  
1285 Inflammatory Cell Infiltration. *J Vis Exp*.
- 1286 Wang, Z., Lorenzi Julio, C.C., Muecksch, F., Finkin, S., Viant, C., Gaebler, C., Cipolla, M., Hoffmann, H.-H., Oliveira  
1287 Thiago, Y., Oren Deena, A., *et al.* (2021). Enhanced SARS-CoV-2 neutralization by dimeric IgA. *Science translational  
1288 medicine* 13, eabf1555.
- 1289 Yao, H., Song, Y., Chen, Y., Wu, N., Xu, J., Sun, C., Zhang, J., Weng, T., Zhang, Z., Wu, Z., *et al.* (2020). Molecular  
1290 Architecture of the SARS-CoV-2 Virus. *Cell* 183, 730-738 e713.
- 1291 Ying, B., Scheaffer, S.M., Whitener, B., Liang, C.-Y., Dmytrenko, O., Mackin, S., Wu, K., Lee, D., Avena, L.E., Chong,  
1292 Z., *et al.* (2022). Boosting with variant-matched or historical mRNA vaccines protects against Omicron infection  
1293 in mice. *Cell*.
- 1294 Yu, Z., and Morrison, M. (2004). Improved extraction of PCR-quality community DNA from digesta and fecal  
1295 samples. *Biotechniques* 36, 808-812.
- 1296 Zhang, Z., Mateus, J., Coelho, C.H., Dan, J.M., Moderbacher, C.R., Gálvez, R.I., Cortes, F.H., Grifoni, A., Tarke, A.,  
1297 Chang, J., *et al.* (2022). Humoral and cellular immune memory to four COVID-19 vaccines. *bioRxiv*,  
1298 2022.2003.2018.484953.
- 1299 Zhu, J., Ananthaswamy, N., Jain, S., Batra, H., Tang, W.-C., Lewry, D.A., Richards, M.L., David, S.A., Kilgore, P.B.,  
1300 Sha, J., *et al.* (2021). A universal bacteriophage T4 nanoparticle platform to design multiplex SARS-CoV-2 vaccine  
1301 candidates by CRISPR engineering. *Science advances* 7, eabh1547.
- 1302 Zhu, J., Ananthaswamy, N., Jain, S., Batra, H., Tang, W.-C., and Rao, V.B. (2022). CRISPR Engineering of  
1303 Bacteriophage T4 to Design Vaccines Against SARS-CoV-2 SARS-CoV-2 and Emerging Pathogens. In *Vaccine Design:  
1304 Methods and Protocols, Volume 1 Vaccines for Human Diseases*, S. Thomas, ed. (New York, NY: Springer US), pp.  
1305 209-228.

1306 Zhu, J., Tao, P., Mahalingam, M., Sha, J., Kilgore, P., Chopra, A.K., and Rao, V. (2019). A prokaryotic-eukaryotic  
1307 hybrid viral vector for delivery of large cargos of genes and proteins into human cells. *Science advances* 5,  
1308 eaax0064.  
1309 Zinatizadeh, M.R., Zarandi, P.K., Zinatizadeh, M., Yousefi, M.H., Amani, J., and Rezaei, N. (2022). Efficacy of mRNA,  
1310 adenoviral vector, and perfusion protein COVID-19 vaccines. *Biomedicine & Pharmacotherapy* 146, 112527.  
1311
